# Supplementary material for: Electrophilic MiniFrags Revealed Unprecedented Binding Sites for Covalent HDAC8 Inhibitors
Source: PubMed Central journal article supplement (PMC10788917; doi:10.1021/acs.jmedchem.3c01779), 2023-12-19
Supplement: jm3c01779_si_001.pdf [file jm3c01779_si_001.pdf]

## Supplementary Information

### Electrophilic MiniFragments revealed unprecedented binding sites for covalent HDAC8 inhibitors

*Aaron B. Keeley*<sup>†a,b,c</sup>, *Aleksandra Koprancovic*<sup>†d</sup>, *Vincenzo Di Lorenzo*<sup>†a,b,c</sup>, *Péter Ábrányi-Balogh*<sup>†a,b,c</sup>, *Niklas Jänsch*<sup>d</sup>, *Linh N. La*<sup>d</sup>, *László Petr*<sup>a,b,c</sup>, *Zoltán Orgován*<sup>a,b,c</sup>, *Daniel Pölöske*<sup>e</sup>, *Anna Orlova*<sup>e</sup>, *András György Németh*<sup>a,b,c</sup>, *Charlotte Desczyk*<sup>d</sup>, *Tímea Imre*<sup>a,f</sup>, *Dávid Bajusz*<sup>a,b,c</sup>, *Richard Morigg*<sup>f</sup>, *Franz-Josef Meyer-Almes*<sup>d\*</sup> and *György M. Keserű*<sup>†a,b,c\*</sup>

<sup>a</sup>Medicinal Chemistry Research Group, Research Centre for Natural Sciences, Magyar tudósok krt 2, H-1117 Budapest, Hungary.

<sup>b</sup>Department of Organic Chemistry and Technology, Faculty of Chemical Technology and Biotechnology, Budapest University of Technology and Economics, Műegyetem rkp. 3., H-1111 Budapest, Hungary

<sup>c</sup>National Laboratory for Drug Research and Development, H-1117 Budapest, Hungary

<sup>d</sup>Department of Chemical Engineering and Biotechnology, University of Applied Sciences Darmstadt, Haardtring 100, 64295 Darmstadt, Germany.

<sup>e</sup>Institute of Animal Breeding and Genetics, University of Veterinary Medicine, 1210 Vienna, Austria.

<sup>f</sup>MS Metabolomics Research Group, Research Centre for Natural Sciences, Magyar tudósok krt 2, H-1117 Budapest, Hungary

Corresponding Author

\*keseru.gyorgy@ttk.hu (G.M.K., lead contact), franz-josef.meyer-almes@h-da.de (F.-J. M.-A.)

### Table of Contents

|                                                                                                                                                                                                                                  |   |
|----------------------------------------------------------------------------------------------------------------------------------------------------------------------------------------------------------------------------------|---|
| <b>Supplementary Figure S1.</b> Thiol reactivity table for heterocyclic electrophiles.                                                                                                                                           | 3 |
| <b>Supplementary Figure S2.</b> Dose-response curves for the determination of IC <sub>50</sub> -values of HDAC8 biochemical assay with the heterocyclic MiniFragments.                                                           | 4 |
| <b>Supplementary Figure S3.</b> Dose-response curves for the determination of IC <sub>50</sub> -values on 10 nM HDAC8 and active site mutants with the heterocyclic MiniFragments.                                               | 5 |
| <b>Supplementary Figure S4.</b> Dose-response curves for the determination of IC <sub>50</sub> -values on 100 nM HDAC8 mutants with the heterocyclic MiniFragments.                                                              | 5 |
| <b>Supplementary Figure S5.</b> The MSMS spectrum and annotation of <b>C6+</b> , <b>D1+</b> , <b>F2+</b> , <b>D3+</b> , <b>F3+</b> , <b>D6+</b> , <b>G6+</b> modified HDAC8 peptide [ <b>1-34</b> ]                              | 6 |
| <b>Supplementary Figure S6.</b> The MSMS spectrum and annotation of <b>C3+</b> modified HDAC8 peptide [ <b>33-83</b> ]                                                                                                           | 7 |
| <b>Supplementary Figure S7.</b> The MSMS spectrum and annotation of <b>A3+</b> , <b>C3+</b> , <b>C6+</b> , <b>D1+</b> , <b>D2+</b> , <b>F2+</b> , <b>D3+</b> , <b>F3+</b> , <b>G6+</b> modified HDAC8 peptide [ <b>148-165</b> ] | 7 |

|                                                                                                                                          |    |
|------------------------------------------------------------------------------------------------------------------------------------------|----|
| <b>Supplementary Figure S8.</b> The MSMS spectrum and annotation of <b>A3+, C3+, C6+, D1+, D2+, D3+</b> modified HDAC8 peptide [241-250] | 9  |
| <b>Supplementary Figure S9.</b> The MSMS spectrum and annotation of <b>C3+, F2+, D3+, F3+, G6+</b> modified HDAC8 peptide [260-287]      | 10 |
| <b>Supplementary Figure S10.</b> The MSMS spectrum and annotation of <b>F3+</b> modified HDAC8 peptide [327-357]                         | 11 |
| <b>Supplementary Figure S11.</b> Results of the dilution experiments proving the irreversible covalent labeling for compounds 3 and B6+  | 11 |
| <b>Supplementary Figure S12.</b> MS Chromatogram for showing the labelling of GSH with <b>F4+</b>                                        | 12 |
| 11                                                                                                                                       |    |
| <b>Supplementary Figure S13.</b> Results of time dependent $IC_{50}$ measurements and $K_I$ , $k_{inact}$ , $k_{inact}/K_I$ calculations | 13 |
| <b>Supplementary Figure S14.</b> Results of the western blot after 72 h treatment of OCI-AML3 cells                                      | 14 |
| <b>NMR spectra and HPLC-MS measurements of lead compounds 2-4 and 10-12</b>                                                              | 14 |
| <b>Supplementary Tables S1, S2, S3</b> Zipped Excel files                                                                                | 25 |

**Supplementary Figure S1.** Thiol reactivity table for heterocyclic electrophiles. Blue dots indicate the position of the warhead. Colouring is in line with the activity, as the darker green colour refers for higher reaction rate and lower half life. Compounds labelled by italic showed parallel reaction with the assay buffer. N.A. stands for “Not available”.

|   |         |  |  |  |  |  |  |  |  |  |  |  |  |  |  |  |  |  |  |
|---|---------|-----------------------------------------------------------------------------------|-----------------------------------------------------------------------------------|-----------------------------------------------------------------------------------|-----------------------------------------------------------------------------------|-----------------------------------------------------------------------------------|-----------------------------------------------------------------------------------|-----------------------------------------------------------------------------------|-----------------------------------------------------------------------------------|-----------------------------------------------------------------------------------|------------------------------------------------------------------------------------|-------------------------------------------------------------------------------------|-------------------------------------------------------------------------------------|-------------------------------------------------------------------------------------|-------------------------------------------------------------------------------------|-------------------------------------------------------------------------------------|-------------------------------------------------------------------------------------|-------------------------------------------------------------------------------------|-------------------------------------------------------------------------------------|
|   |         | $t_{1/2}$ (h) of M+ fragment (250 $\mu$ M) with GSH (5 mM)                        |                                                                                   |                                                                                   |                                                                                   |                                                                                   |                                                                                   |                                                                                   |                                                                                   |                                                                                   |                                                                                    |                                                                                     |                                                                                     |                                                                                     |                                                                                     |                                                                                     |                                                                                     |                                                                                     |                                                                                     |
| 1 | Cl      | >48                                                                               | >48                                                                               | >48                                                                               | >48                                                                               | >48                                                                               | >48                                                                               | >48                                                                               | >48                                                                               | >48                                                                               | >48                                                                                | >48                                                                                 | >48                                                                                 | N.A.                                                                                | >48                                                                                 | N.A.                                                                                | N.A.                                                                                | N.A.                                                                                | N.A.                                                                                |
| 2 | Br      | 35.20                                                                             | >48                                                                               | >48                                                                               | >48                                                                               | N.A.                                                                              | >48                                                                               | >48                                                                               | >48                                                                               | >48                                                                               | >48                                                                                | >48                                                                                 | >48                                                                                 | N.A.                                                                                | N.A.                                                                                | N.A.                                                                                | >48                                                                                 | >48                                                                                 | >48                                                                                 |
| 3 | I       | >48                                                                               | >48                                                                               | >48                                                                               | >48                                                                               | N.A.                                                                              | >48                                                                               | >48                                                                               | 0.16                                                                              | >48                                                                               | >48                                                                                | >48                                                                                 | >48                                                                                 | 0.23                                                                                | >48                                                                                 | N.A.                                                                                | N.A.                                                                                | N.A.                                                                                | N.A.                                                                                |
| 4 | CN      | >48                                                                               | 40.90                                                                             | 0.79                                                                              | 2.00                                                                              | 40.50                                                                             | >48                                                                               | 21.90                                                                             | >48                                                                               | >48                                                                               | N.A.                                                                               | >48                                                                                 | N.A.                                                                                | N.A.                                                                                | N.A.                                                                                | N.A.                                                                                | N.A.                                                                                | N.A.                                                                                | 8.20                                                                                |
| 5 | Vinyl   | 1.00                                                                              | >48                                                                               | 0.26                                                                              | >48                                                                               | N.A.                                                                              | >48                                                                               | 18.50                                                                             | N.A.                                                                              | N.A.                                                                              | >48                                                                                | N.A.                                                                                | N.A.                                                                                | N.A.                                                                                | N.A.                                                                                | N.A.                                                                                | N.A.                                                                                | N.A.                                                                                | N.A.                                                                                |
| 6 | Ethynyl | >48                                                                               | >48                                                                               | 2.40                                                                              | 43.80                                                                             | N.A.                                                                              | >48                                                                               | >48                                                                               | N.A.                                                                              | N.A.                                                                              | 5.70                                                                               | 2.20                                                                                | N.A.                                                                                | N.A.                                                                                | N.A.                                                                                | N.A.                                                                                | N.A.                                                                                | N.A.                                                                                | N.A.                                                                                |

**Supplementary Figure S2.** Dose-response curves for the determination of  $IC_{50}$ -values of HDAC8 biochemical assay with the heterocyclic MiniFrag.

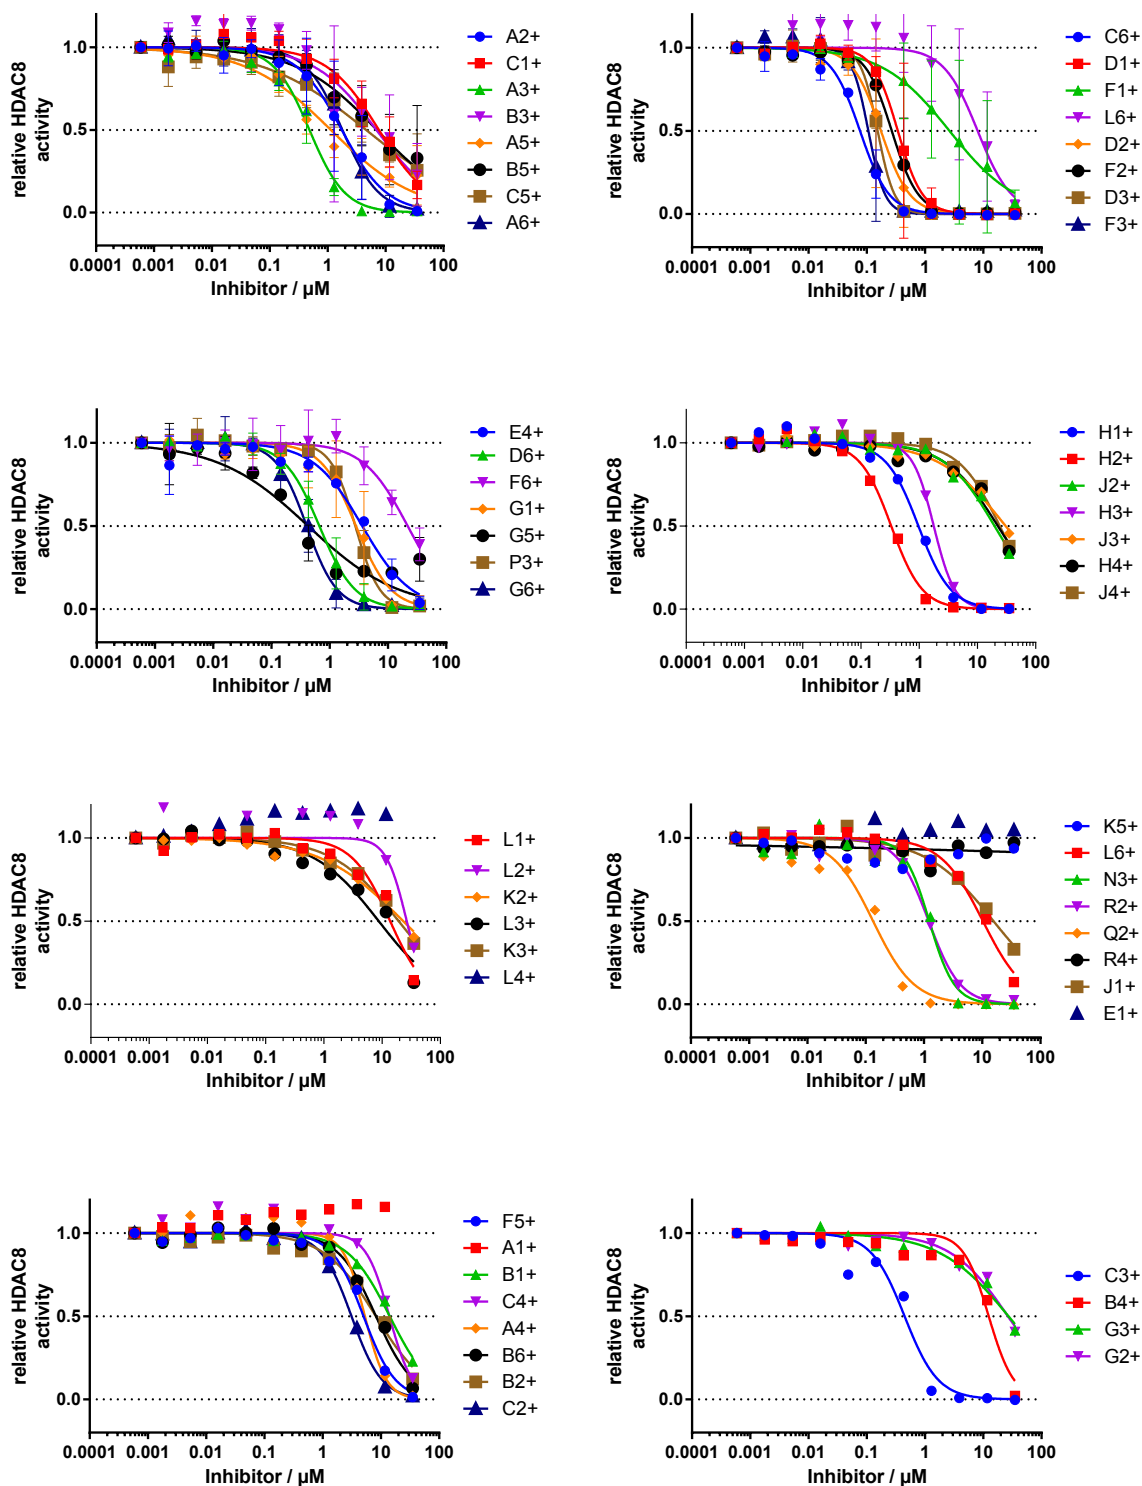

**Supplementary Figure S3.** Dose-response curves for the determination of IC<sub>50</sub>-values on 10 nM HDAC8 and active site mutants with the heterocyclic MiniFrag.

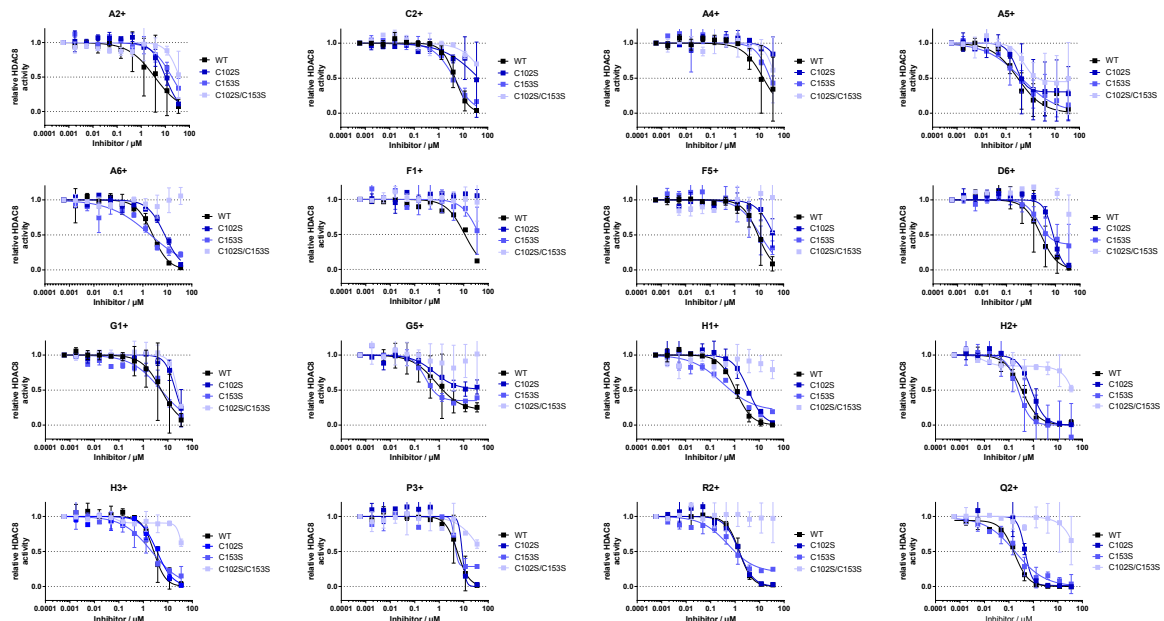

**Supplementary Figure S4.** Dose-response curves for the determination of IC<sub>50</sub>-values on 100 nM HDAC8 mutants with the heterocyclic MiniFrag.

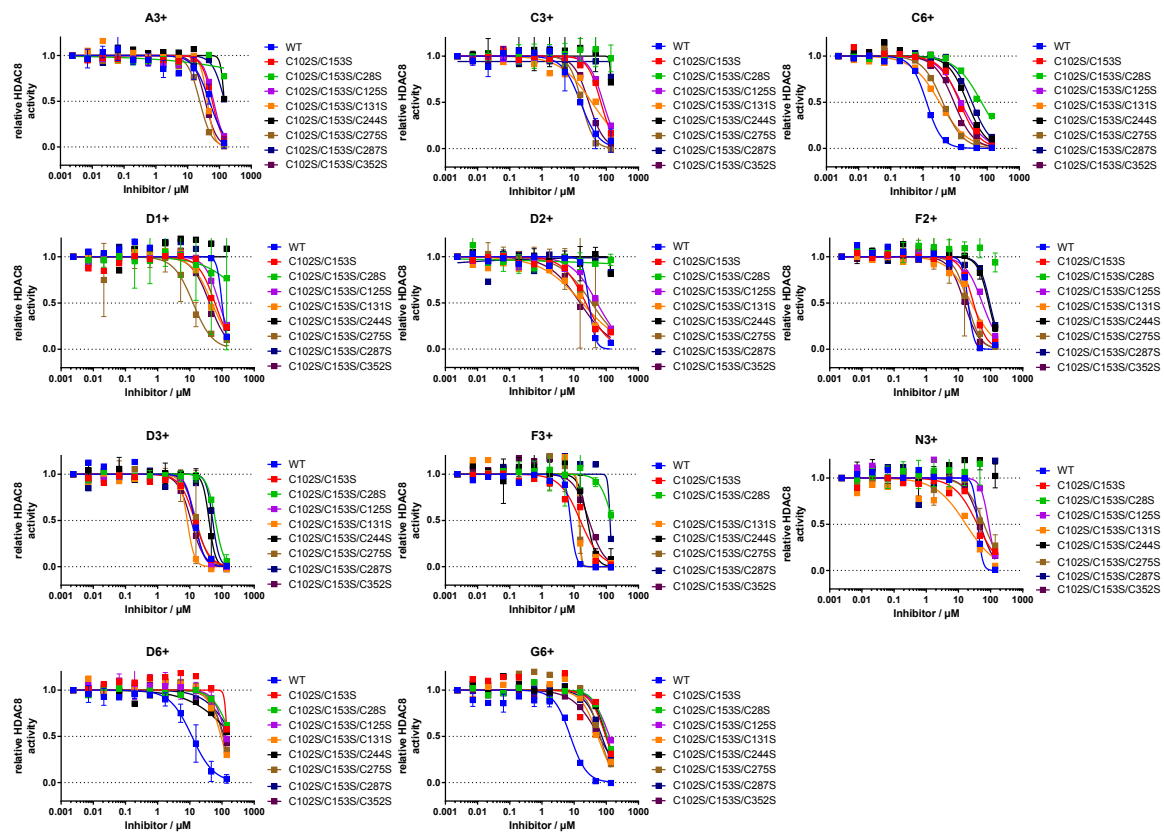

**Supplementary Figure S5. The MSMS spectrum and annotation of C6+, D1+, F2+, D3+, F3+, D6+, G6+ modified HDAC8 peptide [1-34]**

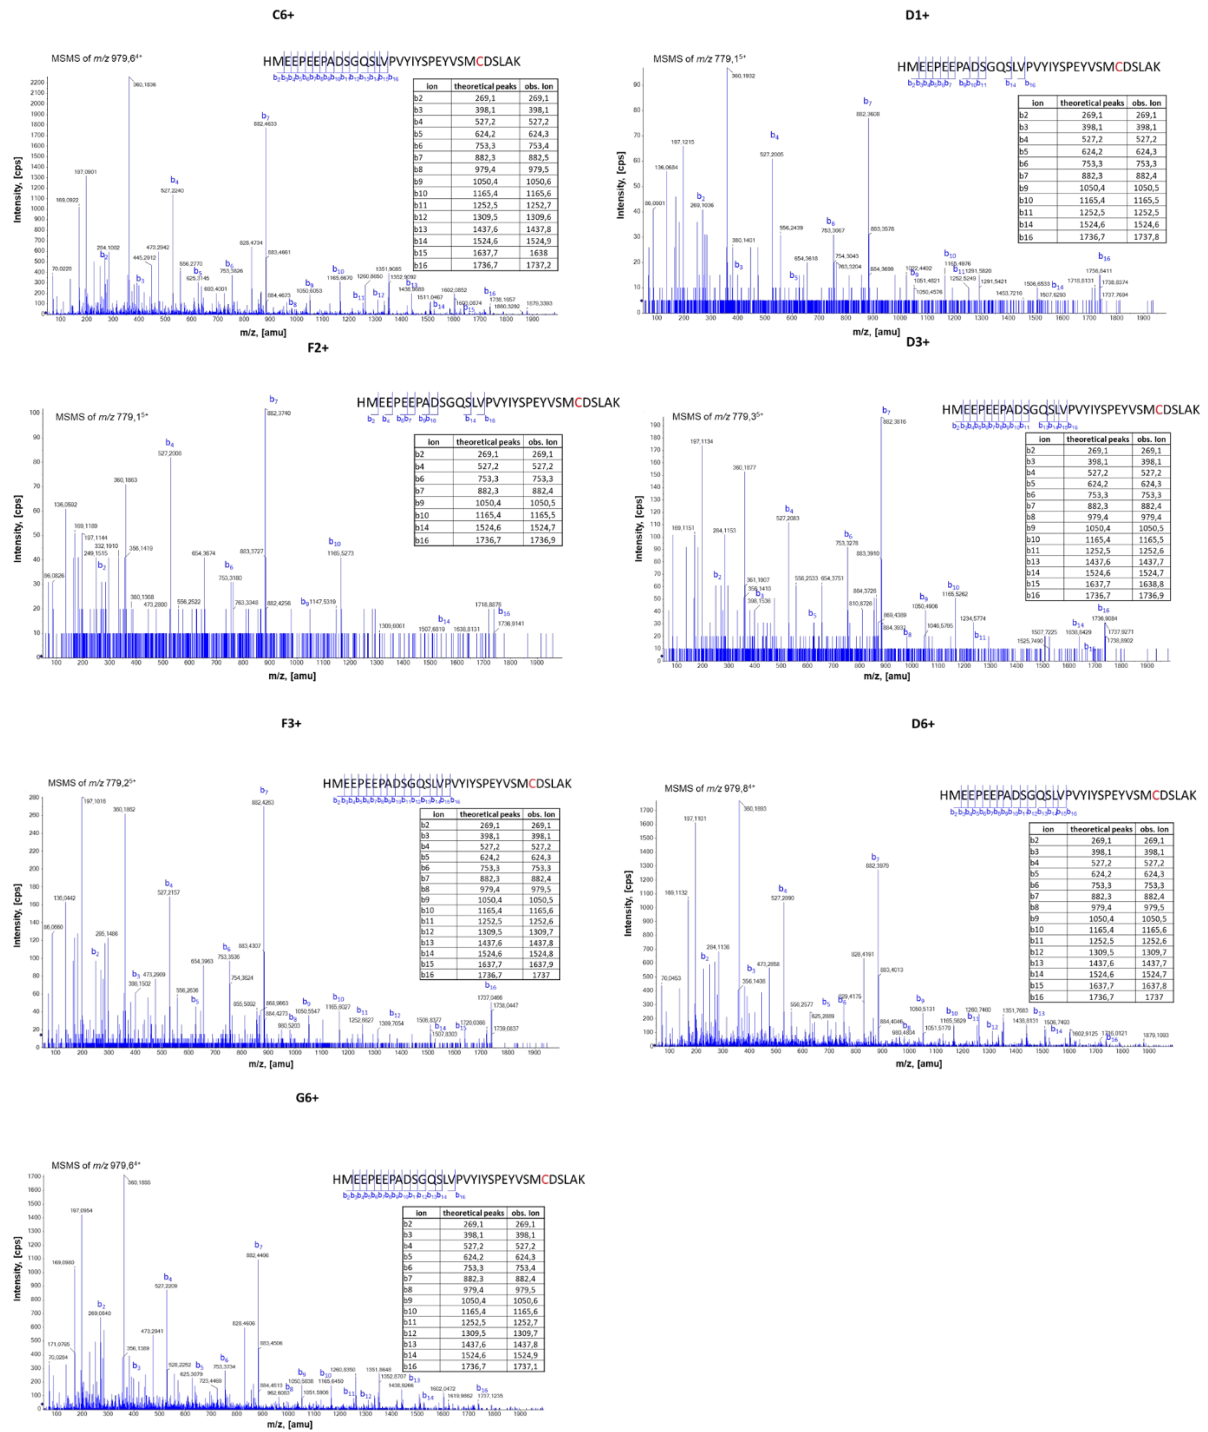

**Supplementary Figure S6. The MSMS spectrum and annotation of C3+ modified HDAC8 peptide [33-83]**

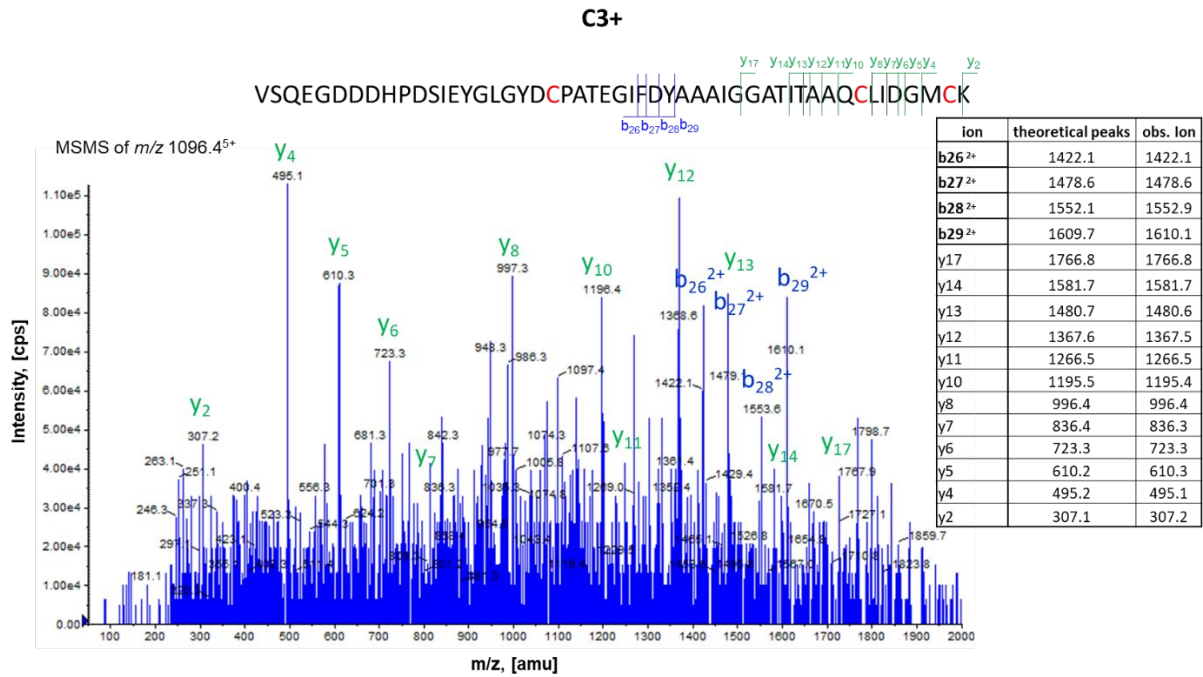

**Supplementary Figure S7. The MSMS spectrum and annotation of A3+, B6+, C3+, C6+, D1+, D2+, F2+, D3+, F3+, G6+, 3 modified HDAC8 peptide [148-165]**

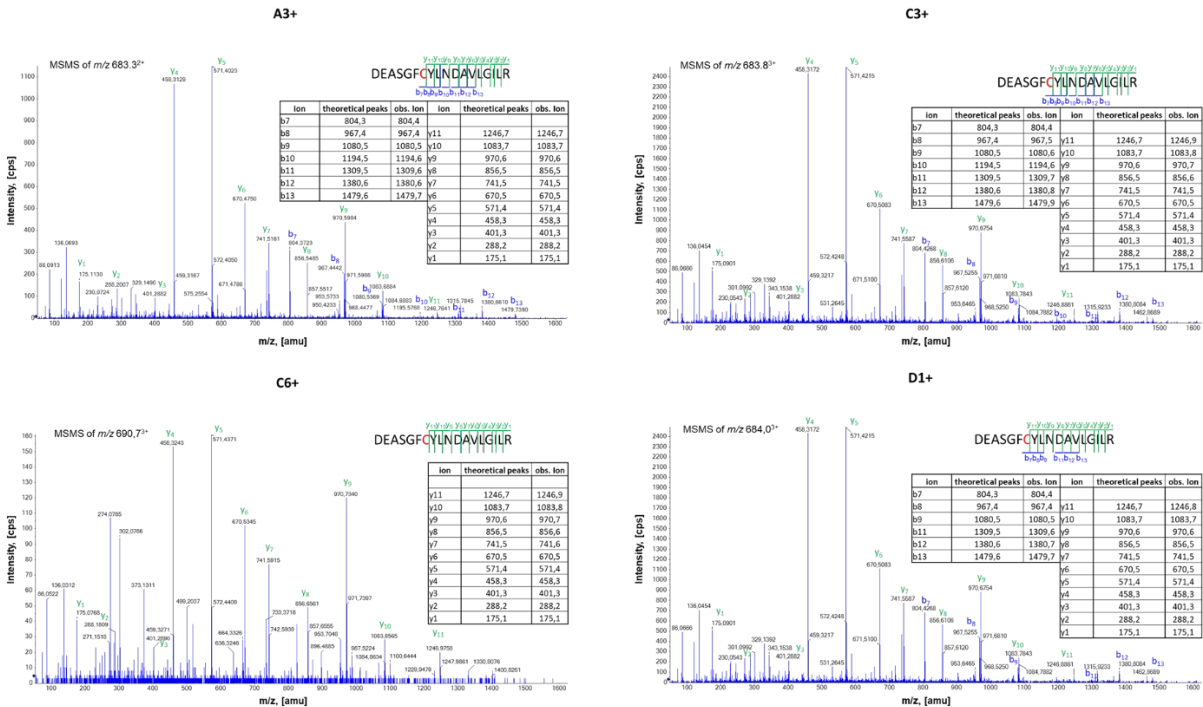

D2+

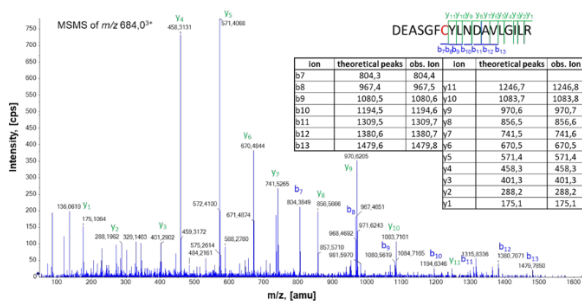

F2+

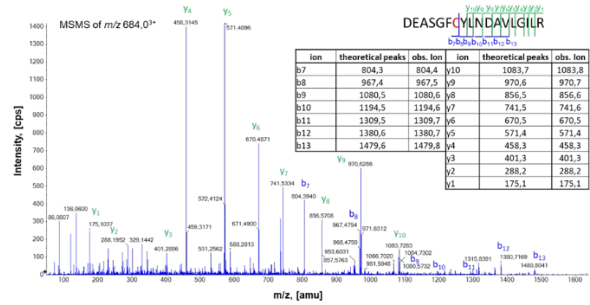

D3+

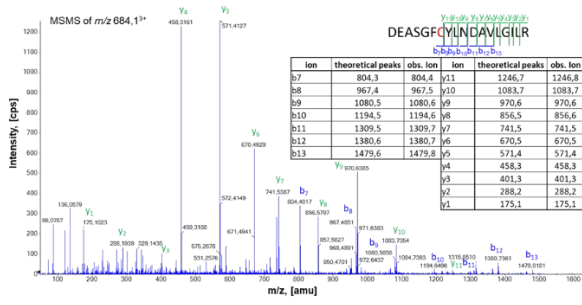

F3+

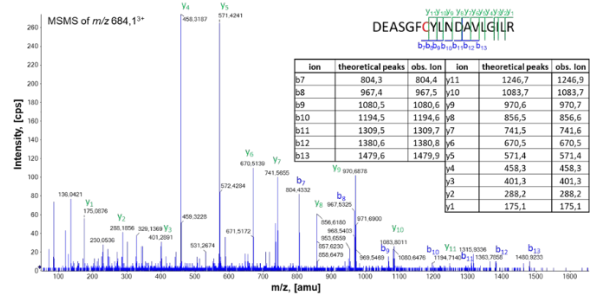

G6+

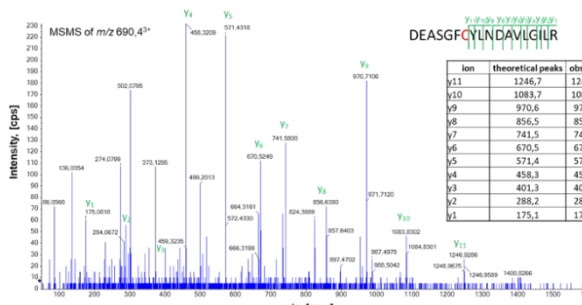

B6+

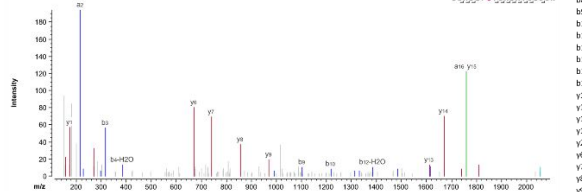

3

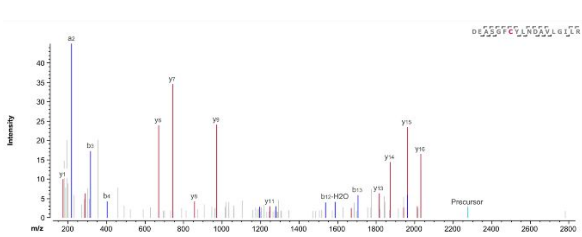

| ion     | theoretical peaks | obs. peak |
|---------|-------------------|-----------|
| b2+H2O  | 227.0667479       | 227.06599 |
| b3      | 316.1139263       | 316.118   |
| b3+H2O  | 296.1033617       | 298.1024  |
| b4+H2O  | 385.1533951       | 385.158   |
| b8      | 990.4195782       | 990.387   |
| b9      | 1103.503642       | 1103.48   |
| b10     | 1217.54657        | 1217.507  |
| b11     | 1332.573513       | 1332.52   |
| b11+H2O | 1314.562948       | 1314.528  |
| b12+H2O | 1385.600062       | 1385.597  |
| b13+H2O | 1484.668476       | 1484.651  |
| b14     | 1615.702104       | 1615.729  |
| y13     | 1613.90423        | 1613.846  |
| y14     | 1670.925693       | 1670.899  |
| y15+H2O | 1739.947157       | 1739.902  |
| y16+H2O | 1810.984271       | 1810.949  |
| y2-MH3  | 271.176467        | 271.1768  |
| y6      | 670.4610217       | 670.4662  |
| y7      | 741.4961353       | 741.5108  |
| y8      | 856.5250785       | 856.5337  |
| y8      | 970.568009        | 970.5461  |



**Supplementary Figure S8. The MSMS spectrum and annotation of A3+, C3+, C6+, D1+, D2+, D3+ modified HDAC8 peptide [241-250]**

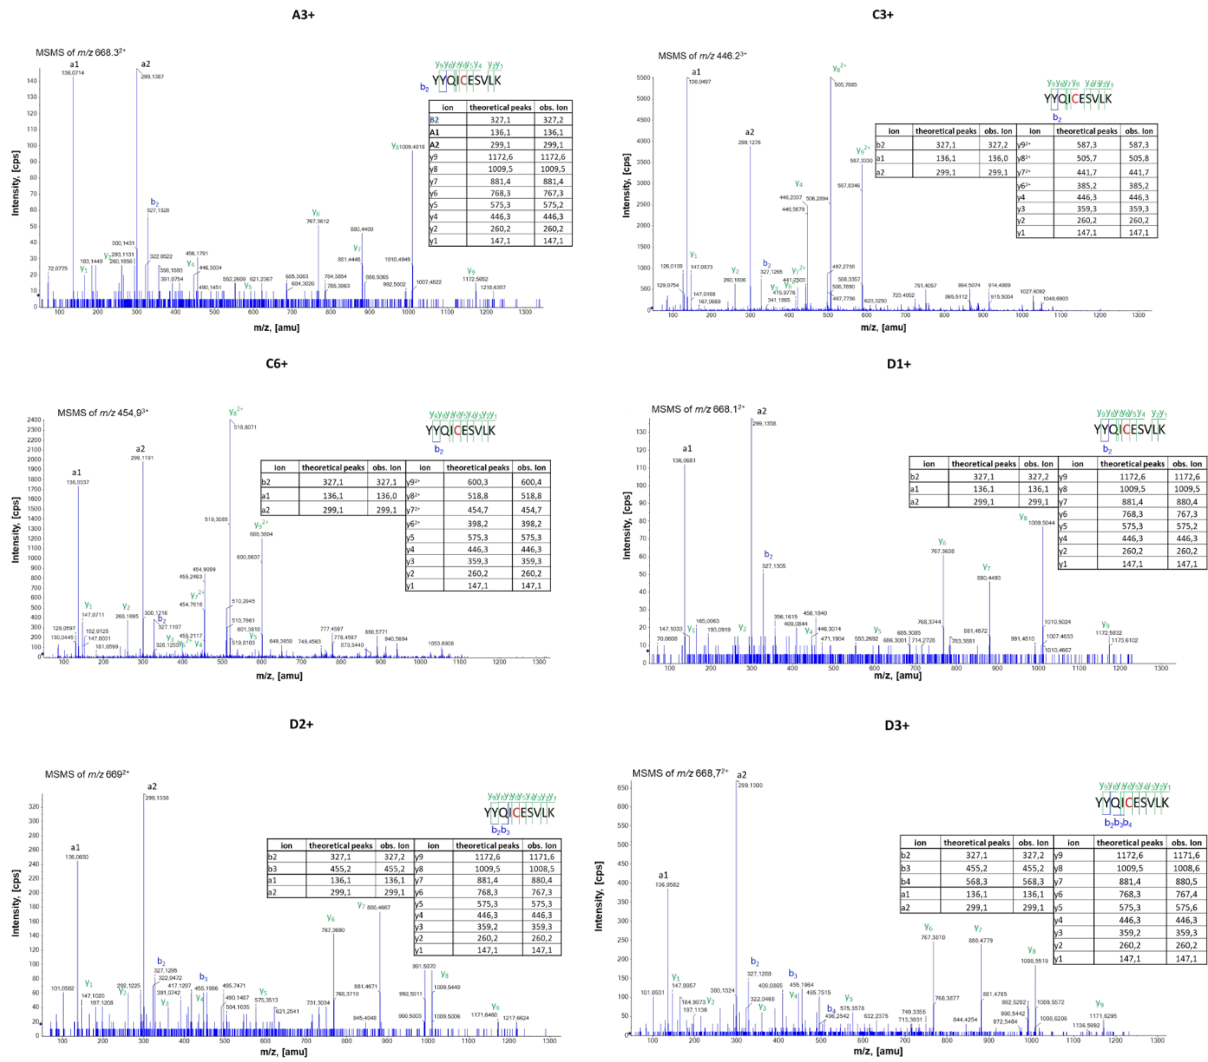

**Supplementary Figure S9. The MSMS spectrum and annotation of C3+, F2+, D3+, F3+, G6+ modified HDAC8 peptide [260-287]**

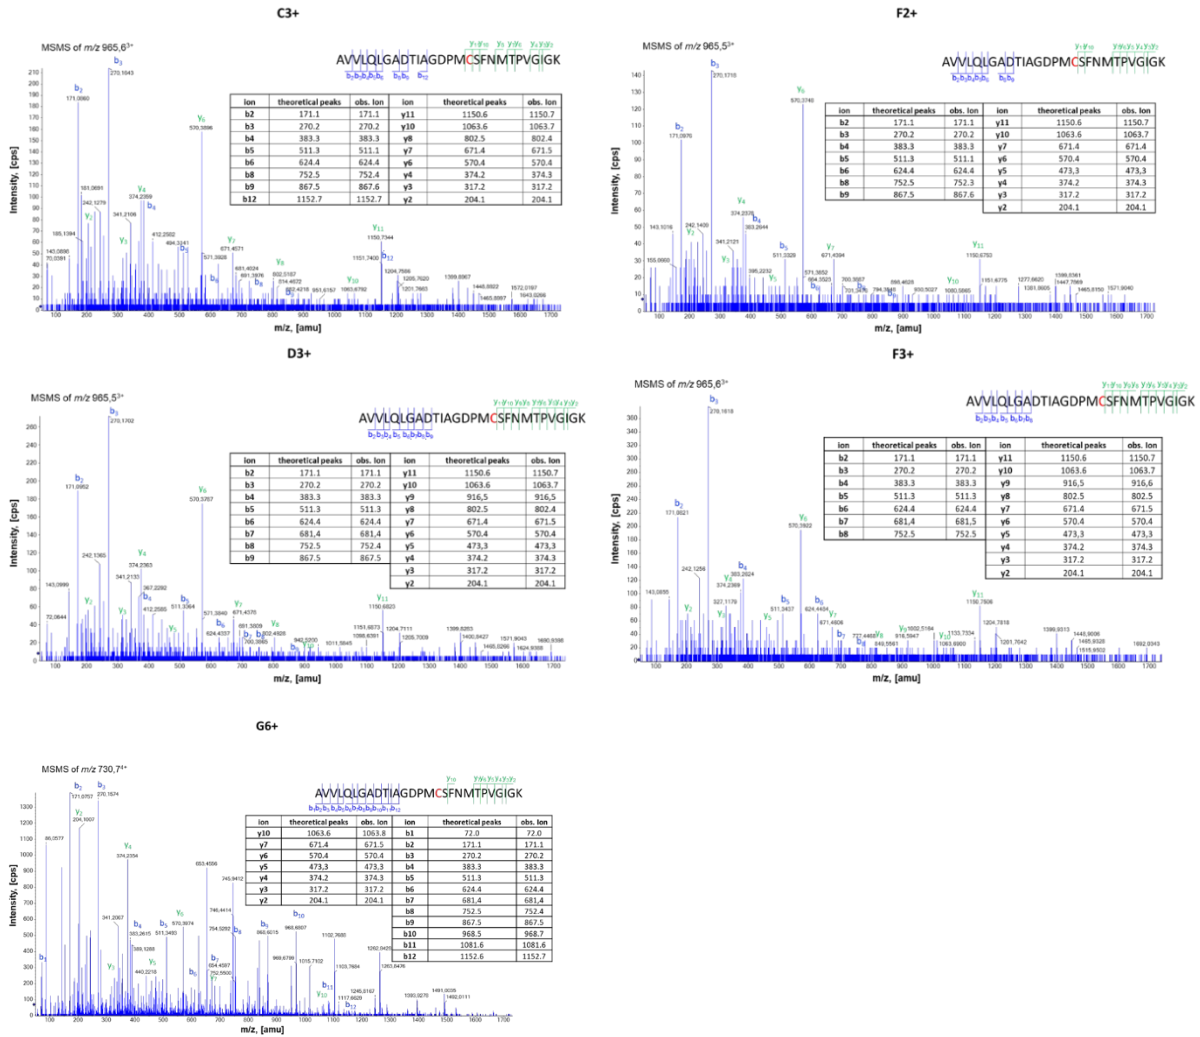

**Supplementary Figure S10.** The MSMS spectrum and annotation of **F3+** modified HDAC8 peptide [327-357]

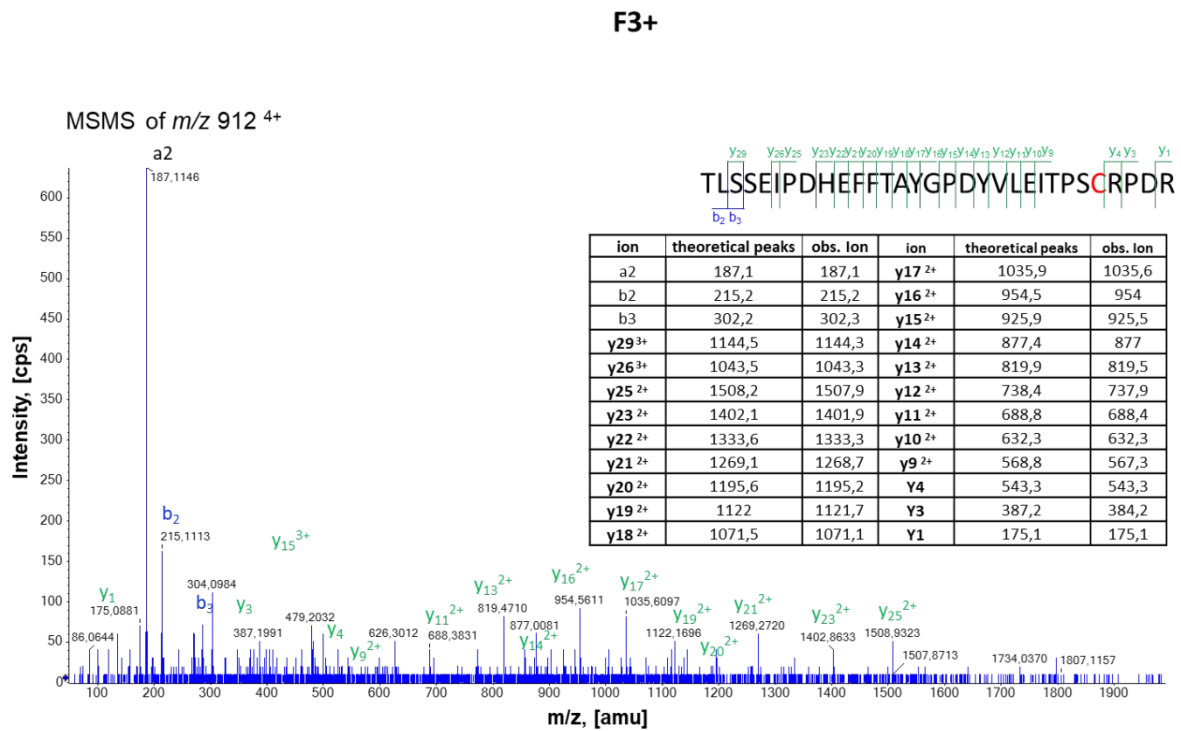

**Supplementary Figure S11.** Results of the dilution experiments proving the irreversible covalent labeling for compounds **3** and **B6+**

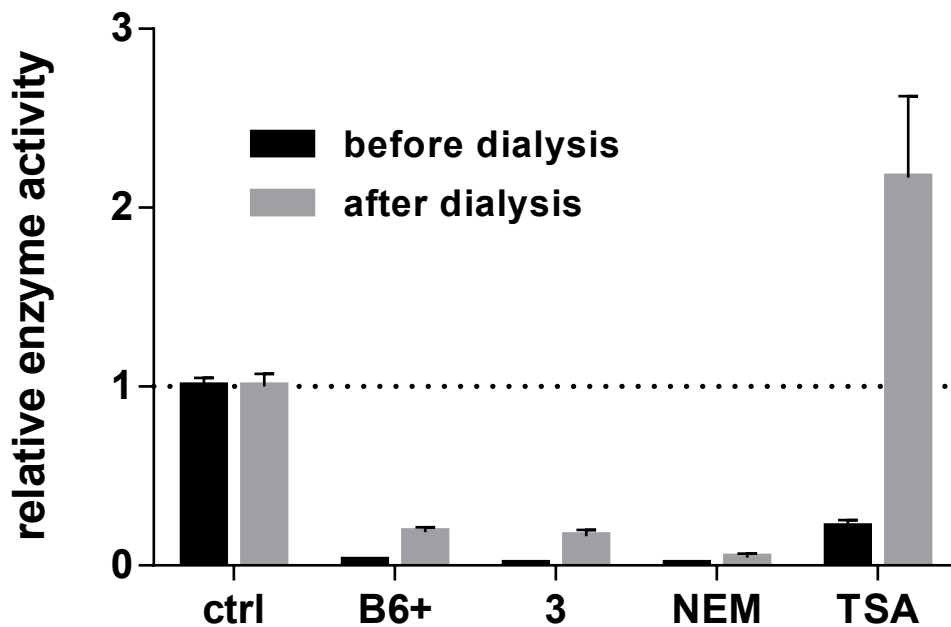

Reversibility of **B6+** and **3** on HDAC8 WT shown as relative enzyme activity before and after dialysis. Error bars represent mean +/- SD, n = 3

Supplementary Figure S12. MS Chromatogram for showing the labelling of GSH with F4+

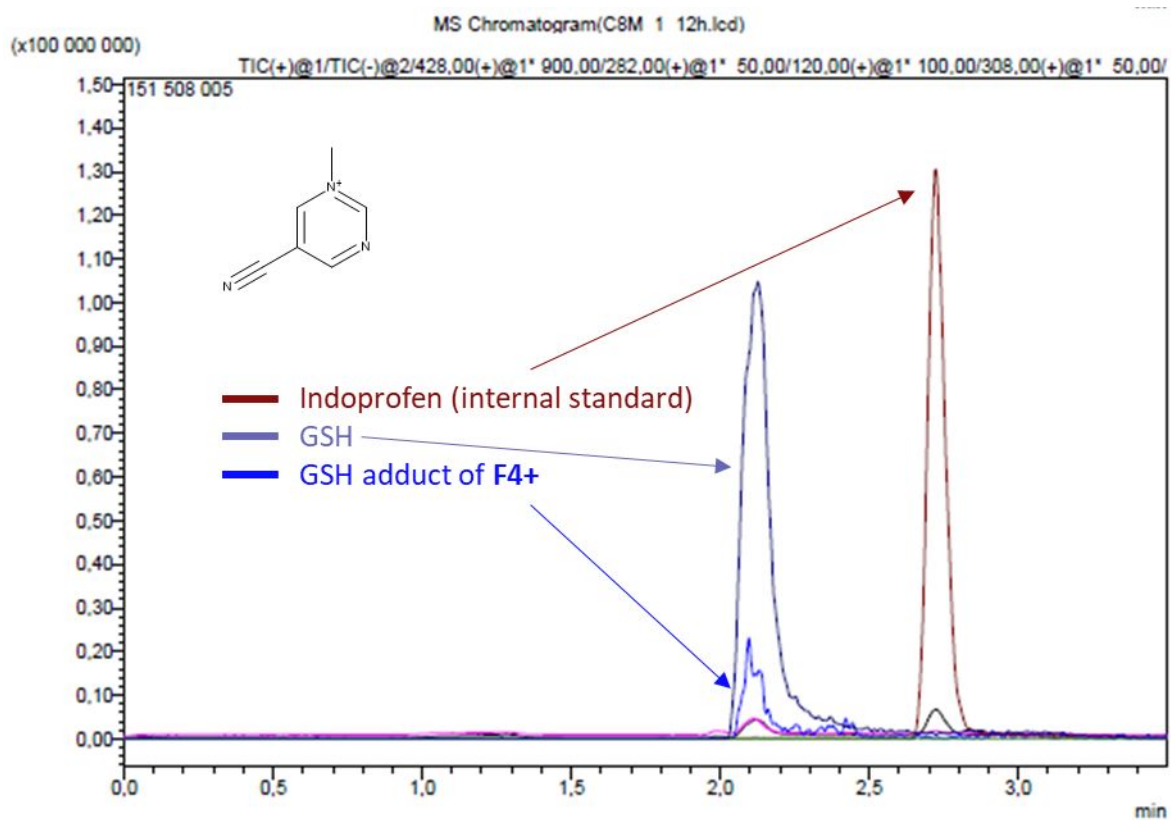

Supplementary Figure S13. Results of time dependent  $IC_{50}$  measurements and  $K_i$ ,  $k_{inact}$ ,  $k_{inact}/K_i$  calculations

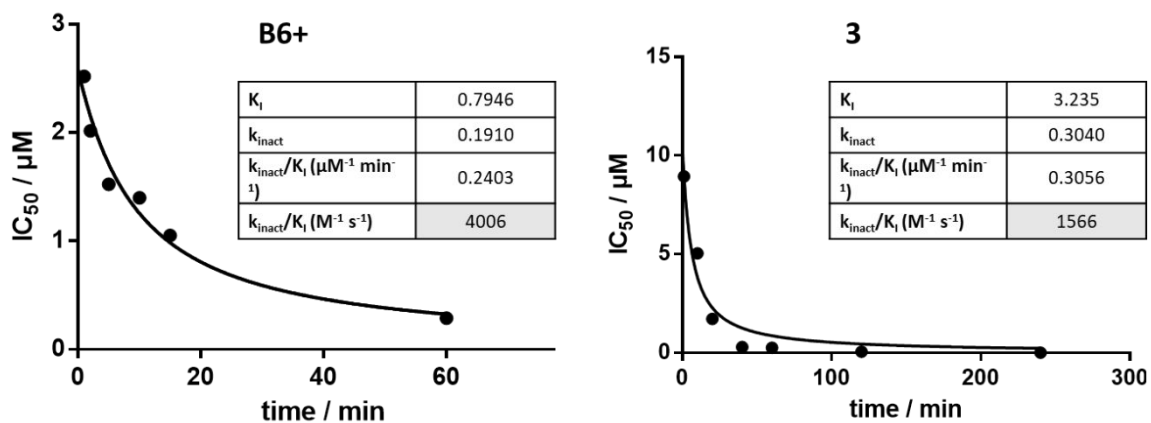

**Supplementary Figure S14.** Results of the western blot after 72 h treatment of OCI-AML3 cells

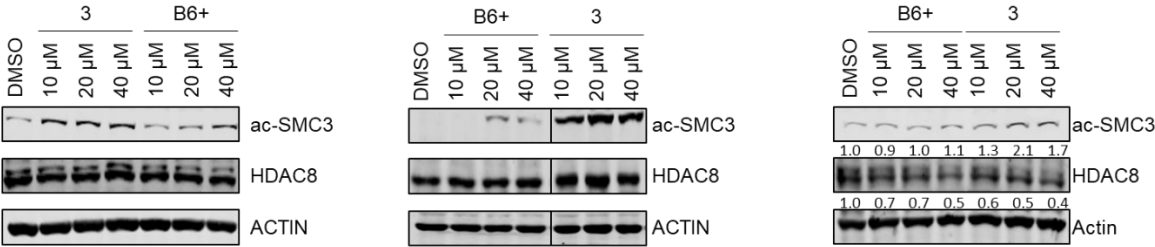

$^1\text{H}$ ,  $^{13}\text{C}$  NMR spectra and HPLC-MS chromatogram and spectrum of **10**

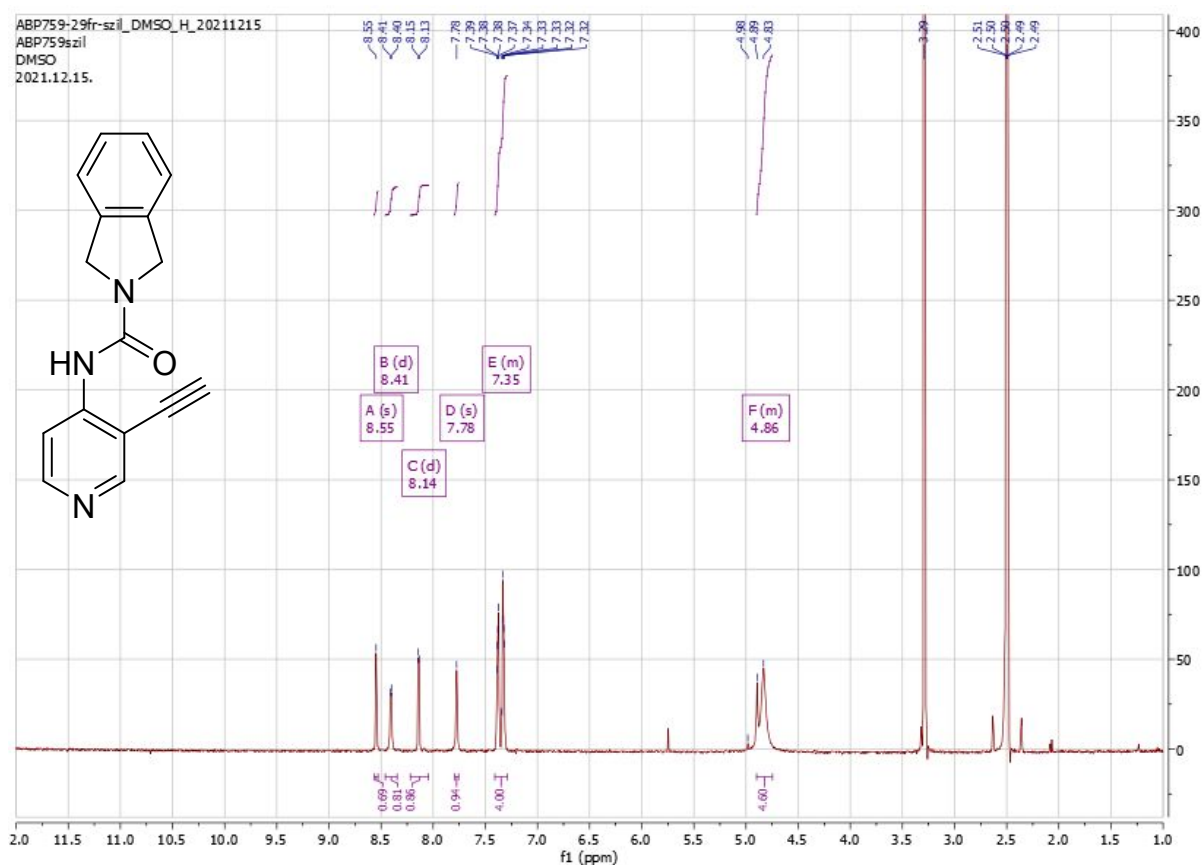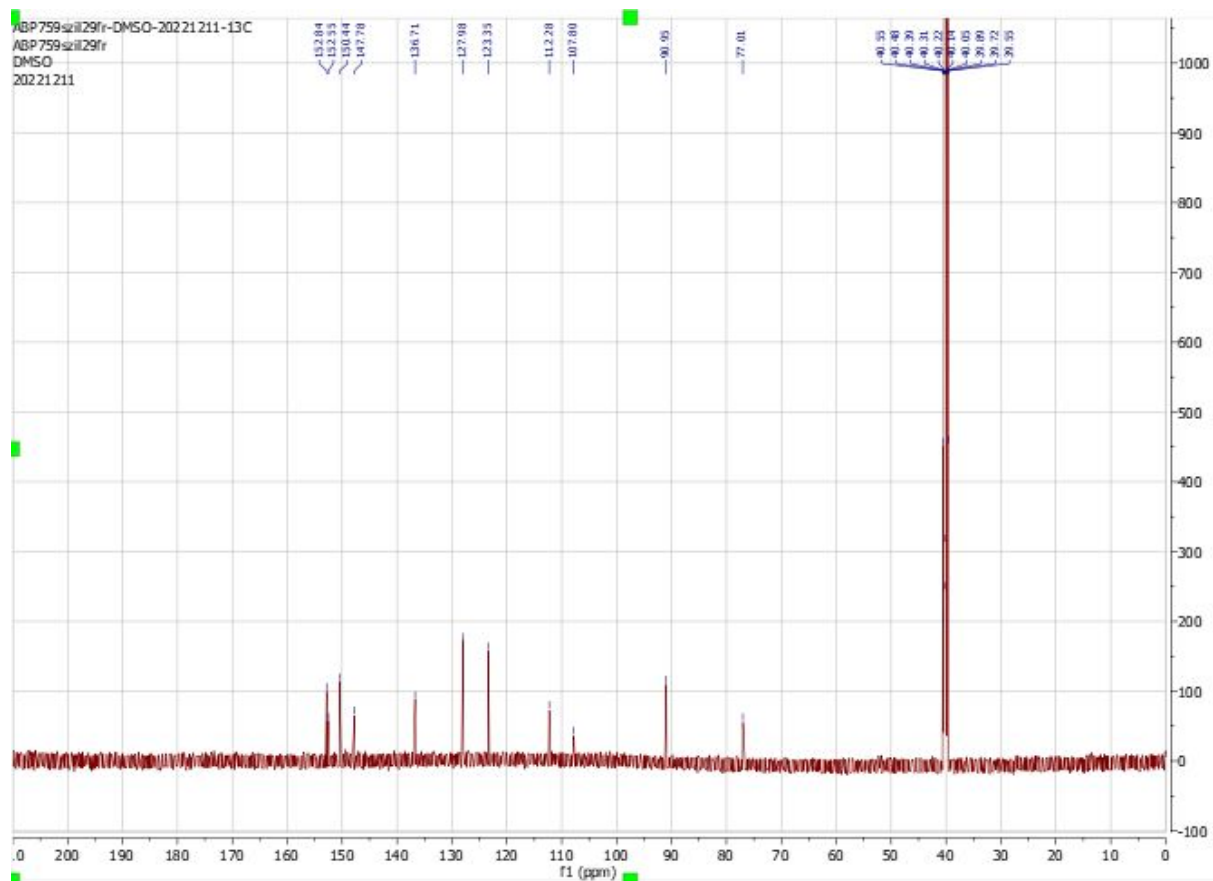

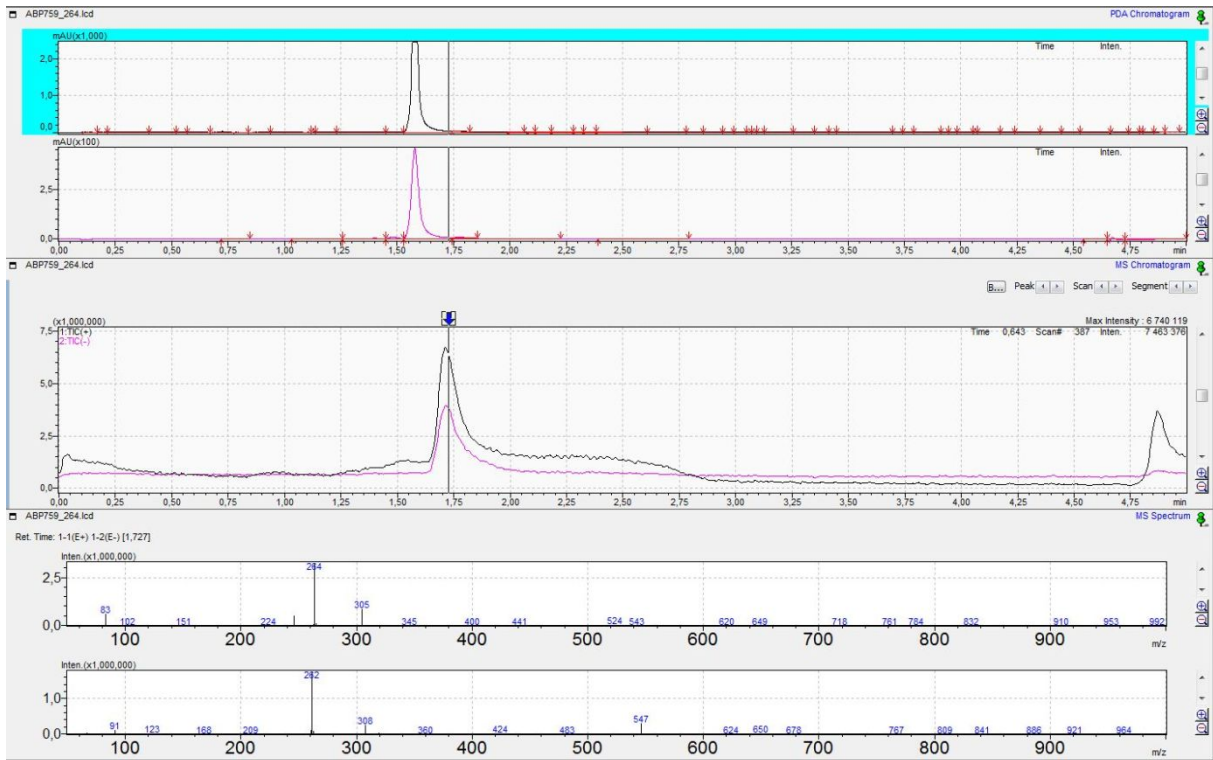

| Peak# | Ret. Time | Height  | Area    | Area%  | Peak# | Ret. Time | Height | Area    | Area%  |
|-------|-----------|---------|---------|--------|-------|-----------|--------|---------|--------|
| 1     | 0.725     | 24741   | 37777   | 0.532  | 1     | 0.731     | 1889   | 1712    | 0.14   |
| 2     | 1.398     | 6182    | 14949   | 0.21   | 2     | 1.481     | 7918   | 15921   | 1.302  |
| 3     | 1.48      | 7303    | 13471   | 0.19   | 3     | 1.579     | 442987 | 1189213 | 97.282 |
| 4     | 1.578     | 2451693 | 7026877 | 98.907 | 4     | 4.677     | 8151   | 15595   | 1.276  |
| 5     | 4.677     | 9501    | 11489   | 0.162  | Total |           | 460945 | 1222441 | 100    |
| Total |           | 2499419 | 7104563 | 100    |       |           |        |         |        |

$^1\text{H}$ ,  $^{13}\text{C}$  NMR spectra and HPLC-MS chromatogram and spectrum of **2**

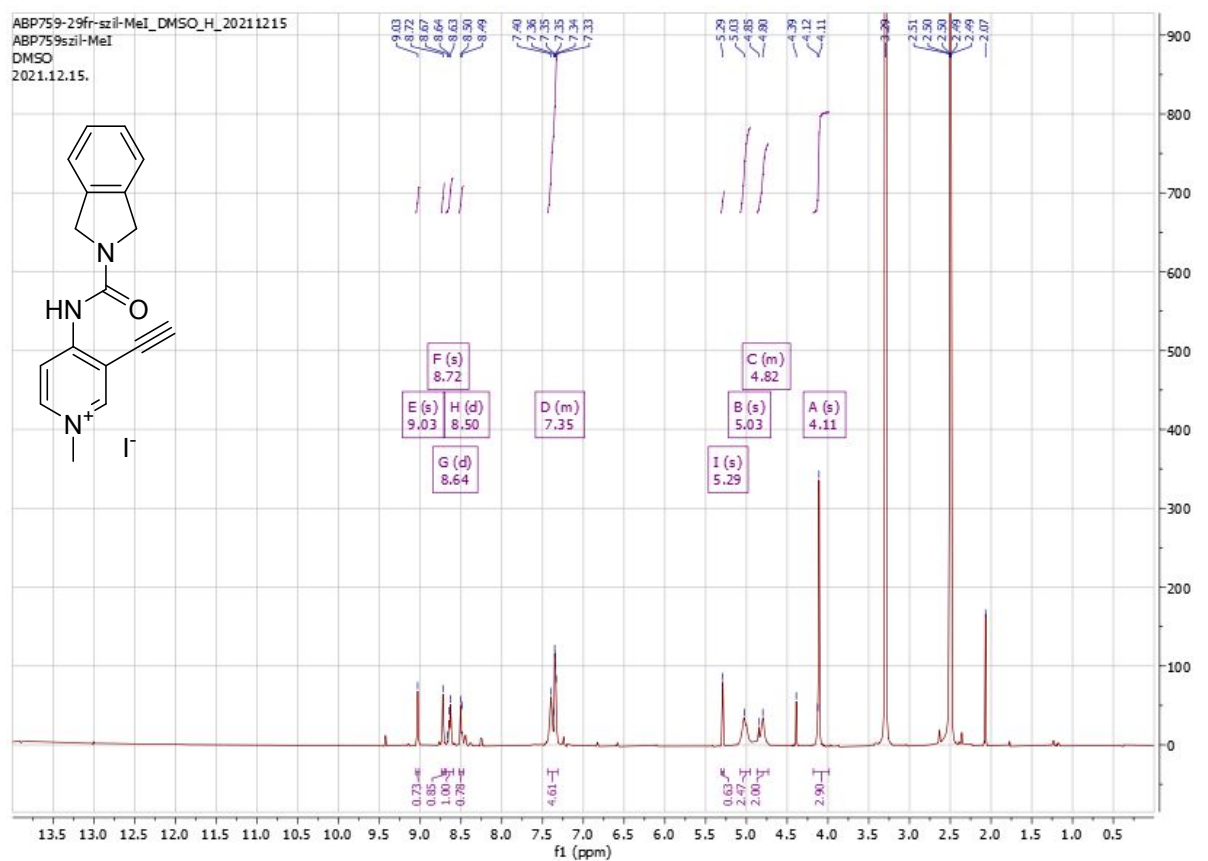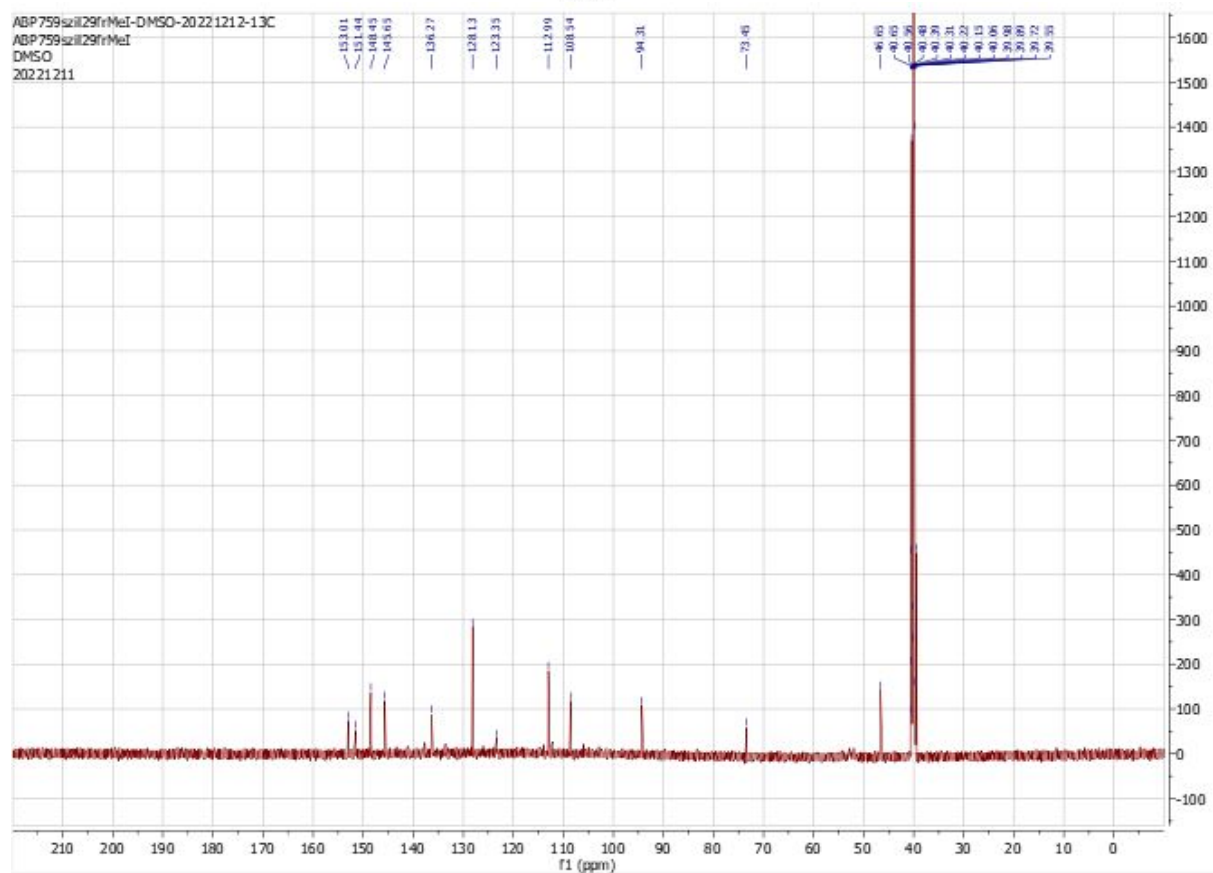



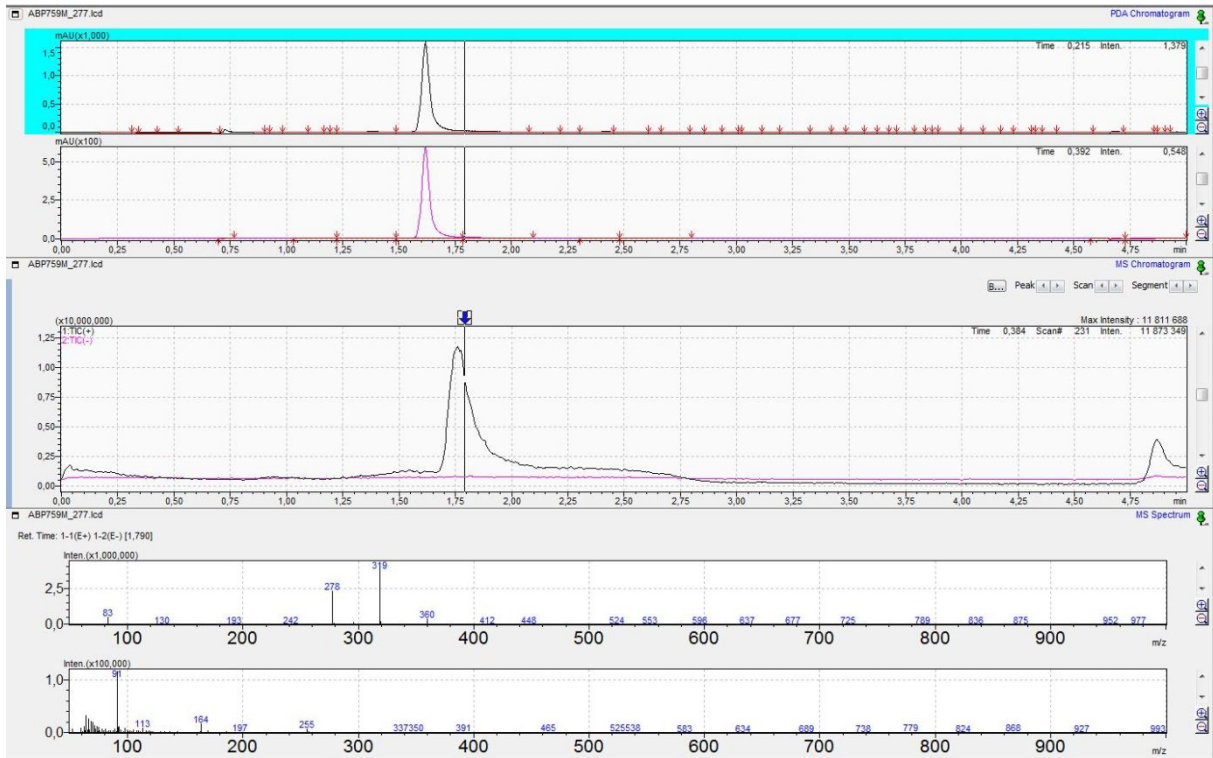

| Peak# | Ret. Time | Height | Area    | Area%  | Peak# | Ret. Time | Height  | Area    | Area%  |
|-------|-----------|--------|---------|--------|-------|-----------|---------|---------|--------|
| 1     | 0.733     | 3107   | 2315    | 0.143  | 1     | 0.729     | 48007   | 116486  | 2.516  |
| 2     | 1.399     | 1313   | 5120    | 0.316  | 2     | 1.397     | 8332    | 44423   | 0.959  |
| 3     | 1.618     | 575510 | 1595585 | 98.365 | 3     | 1.618     | 1520747 | 4449011 | 96.093 |
| 4     | 2.536     | 1438   | 19094   | 1.177  | 4     | 2.428     | 4781    | 17338   | 0.374  |
| Total |           | 581368 | 1622114 | 100    | 5     | 4.692     | 7435    | 2642    | 0.057  |
|       |           |        |         |        | Total |           | 1589303 | 4629901 | 100    |

$^1\text{H}$ ,  $^{13}\text{C}$  NMR spectra and HPLC-MS chromatogram and spectrum of **12**

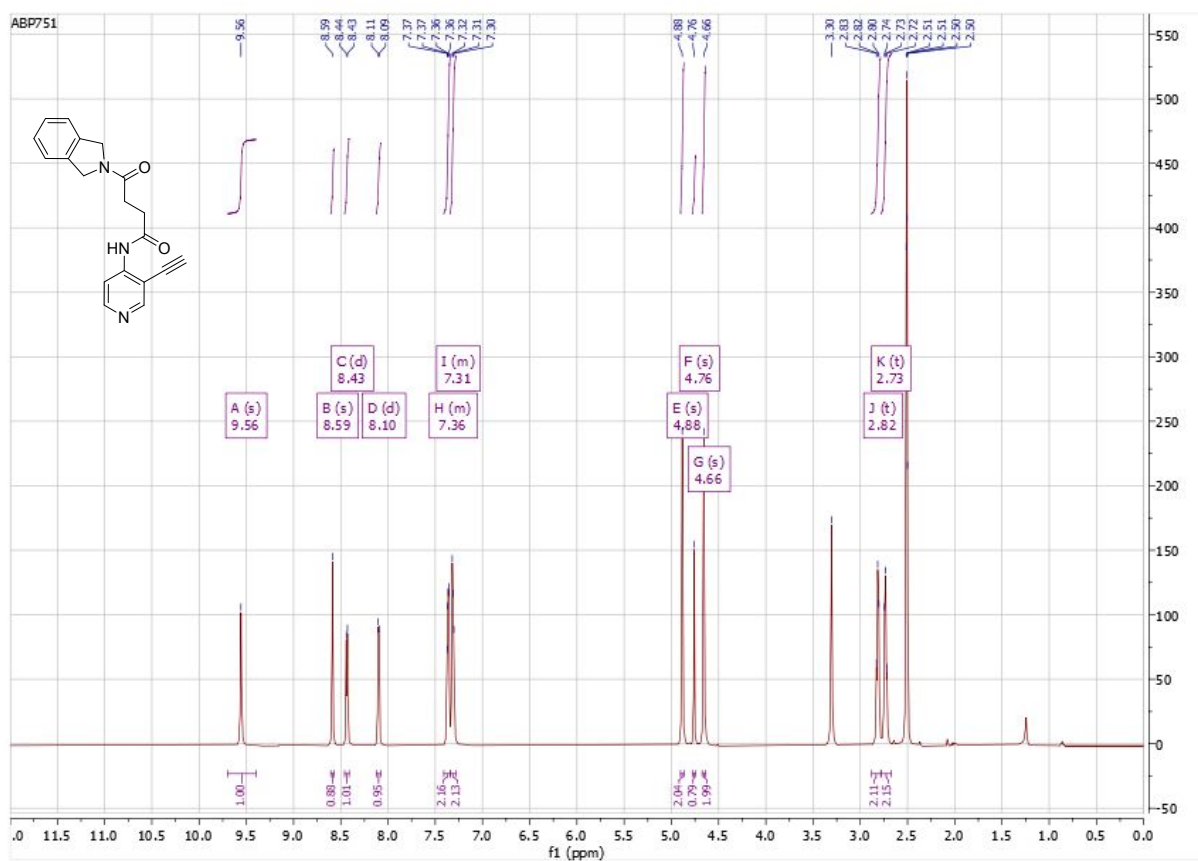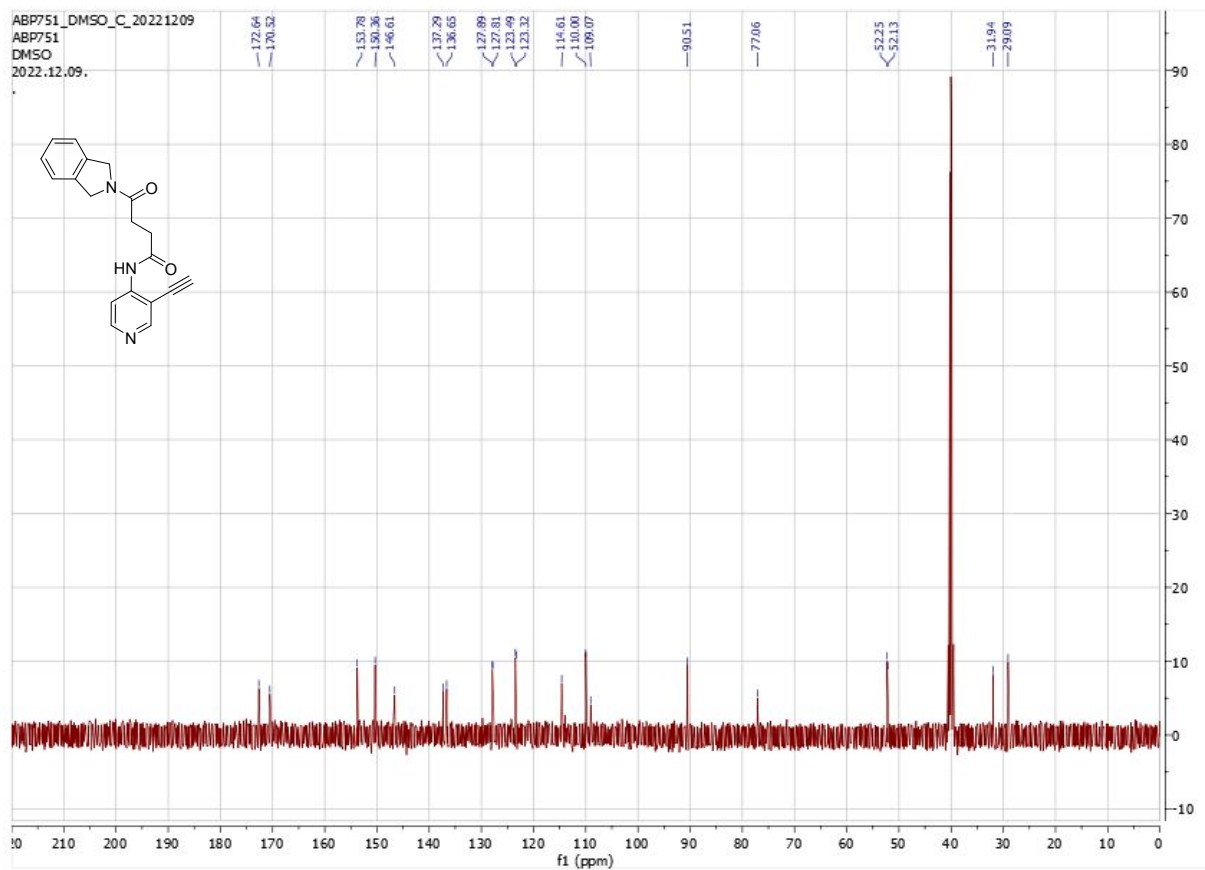

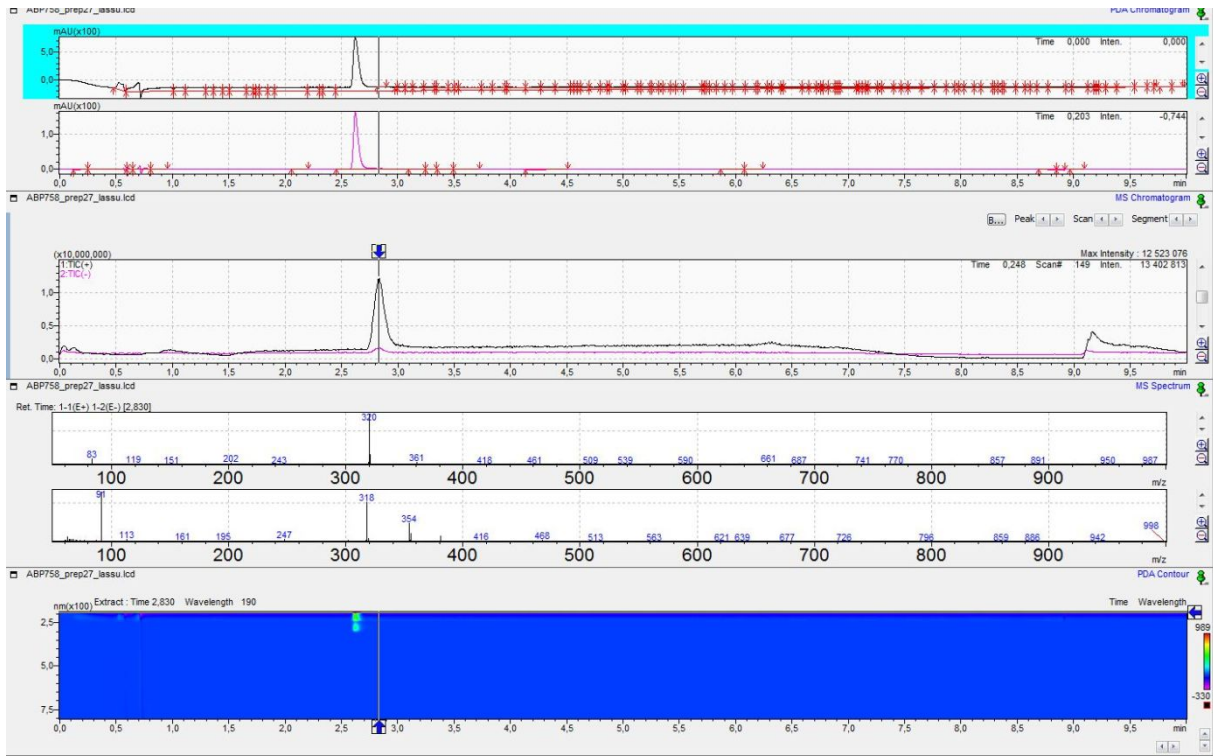

| Peak# | Ret. Time | Height | Area    | Area%  | Peak# | Ret. Time | Height | Area    | Area%  |
|-------|-----------|--------|---------|--------|-------|-----------|--------|---------|--------|
| 1     | 1.188     | 4855   | 19412   | 0.632  | 1     | 1.188     | 4855   | 19412   | 0.632  |
| 2     | 1.369     | 6076   | 32406   | 1.055  | 2     | 1.369     | 6076   | 32406   | 1.055  |
| 3     | 2.623     | 883032 | 3009149 | 97.981 | 3     | 2.623     | 883032 | 3009149 | 97.981 |
| 4     | 8.907     | 10740  | 10203   | 0.332  | 4     | 8.907     | 10740  | 10203   | 0.332  |
| Total |           | 904703 | 3071170 | 100    | Total |           | 904703 | 3071170 | 100    |

$^1\text{H}$ ,  $^{13}\text{C}$  NMR spectra and HPLC-MS chromatogram and spectrum of **4**

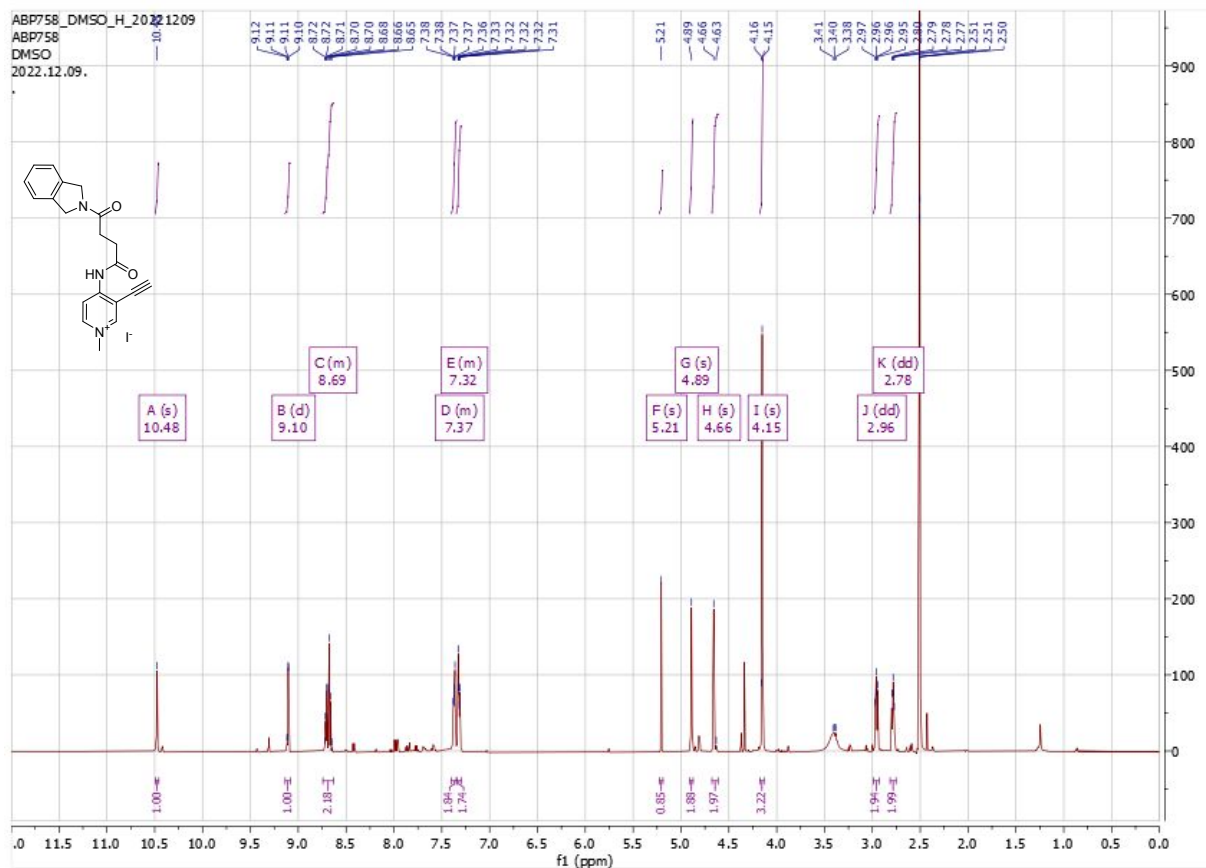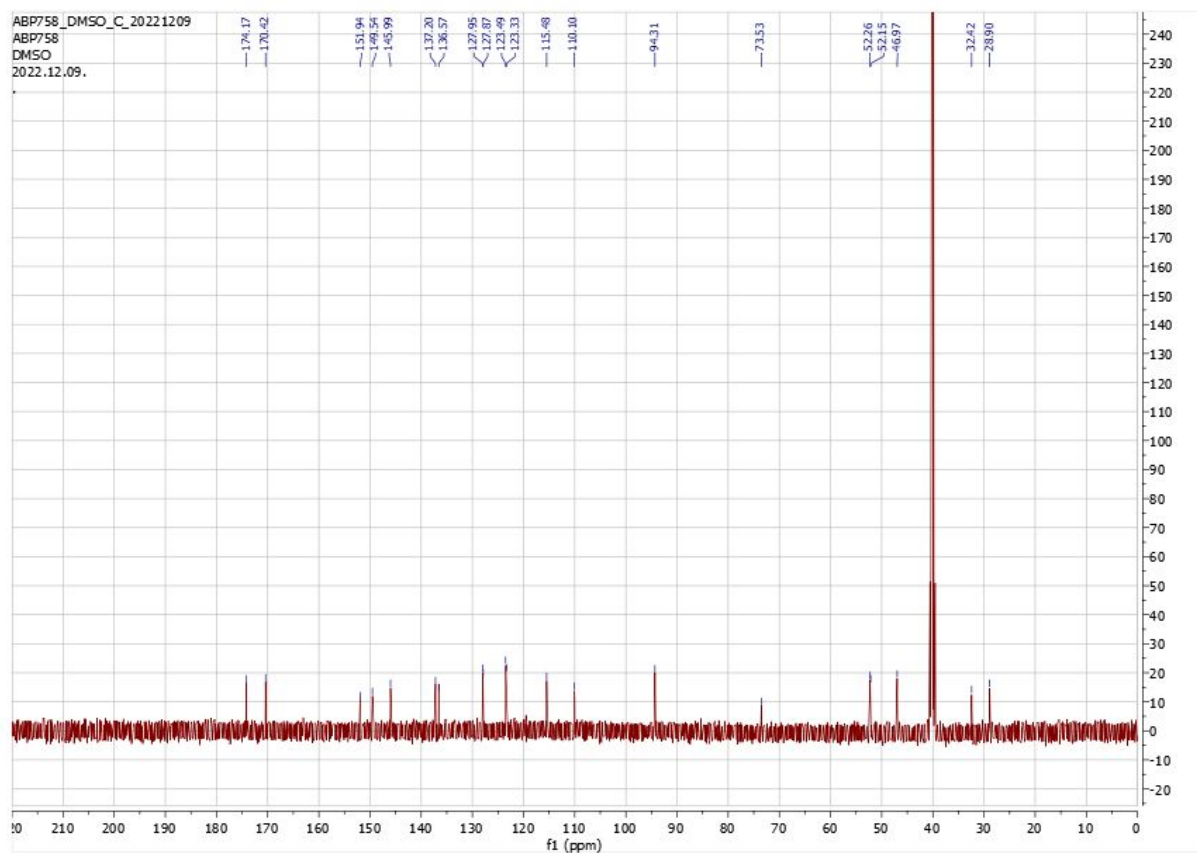

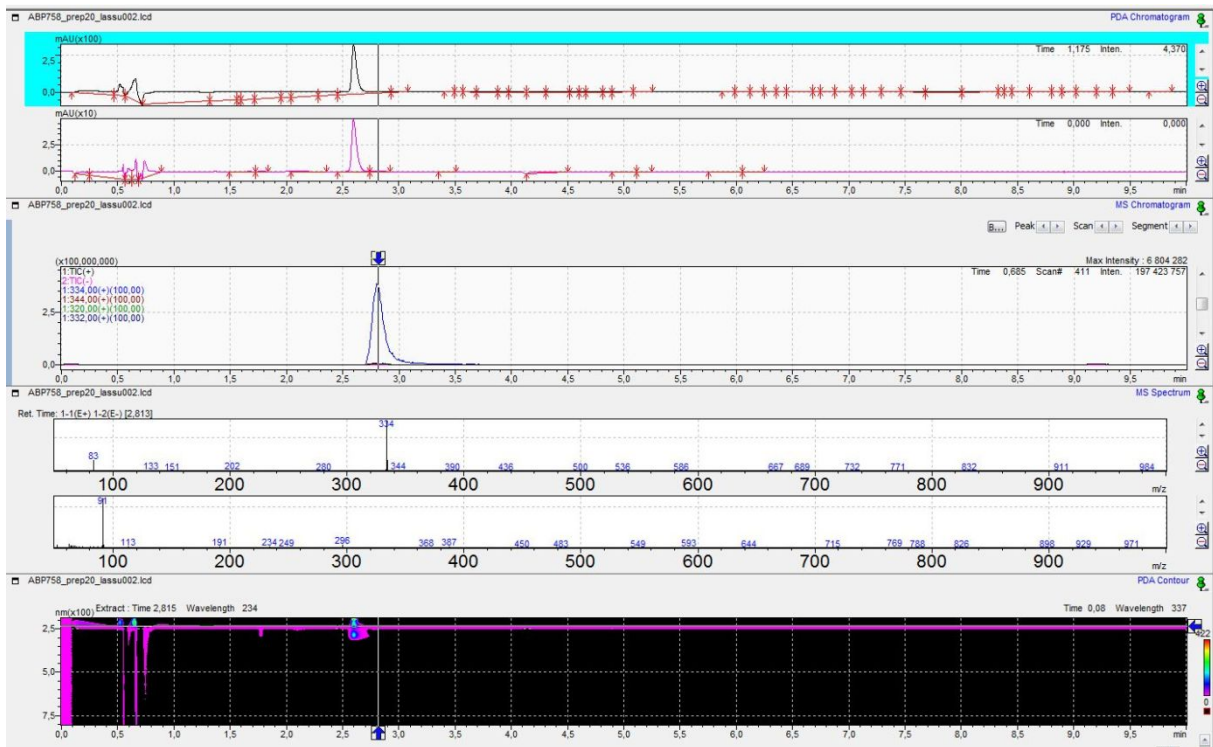

| Peak# | Ret. Time | Height | Area    | Area%  | Peak# | Ret. Time | Height | Area   | Area% |
|-------|-----------|--------|---------|--------|-------|-----------|--------|--------|-------|
| 1     | 1.412     | 11222  | 55150   | 3.429  | 1     | 1.37      | 165    | 230    | 0.149 |
| 2     | 1.851     | 277    | -634    | -0.039 | 2     | 1.773     | 546    | 1103   | 0.713 |
| 3     | 2.108     | 4136   | 13261   | 0.825  | 3     | 2.099     | 429    | 1465   | 0.948 |
| 4     | 2.598     | 471237 | 1539452 | 95.727 | 4     | 2.598     | 48676  | 151770 | 98.19 |
| 5     | 7.587     | 1097   | 932     | 0.058  | Total |           | 49816  | 154568 | 100   |
| Total |           | 487970 | 1608161 | 100    |       |           |        |        |       |

$^1\text{H}$ ,  $^{13}\text{C}$  NMR spectra and HPLC-MS chromatogram and spectrum of **11**

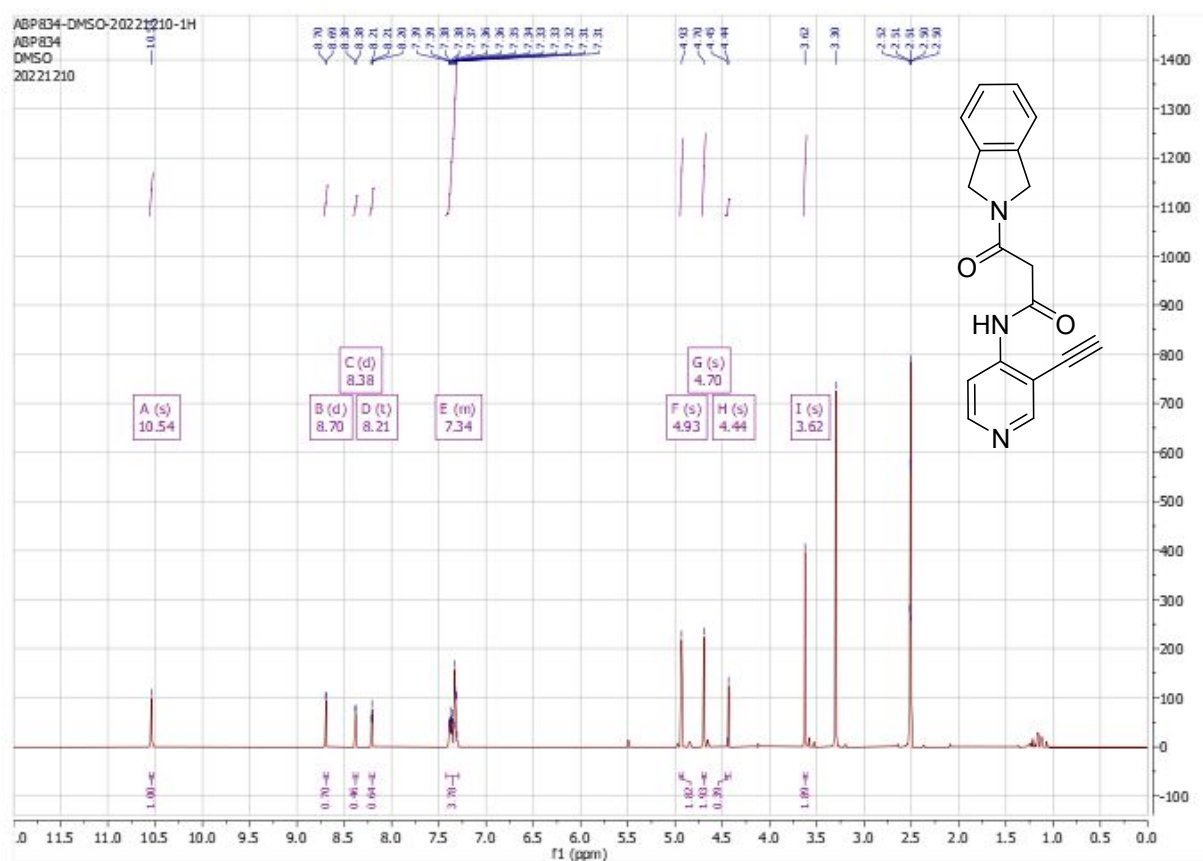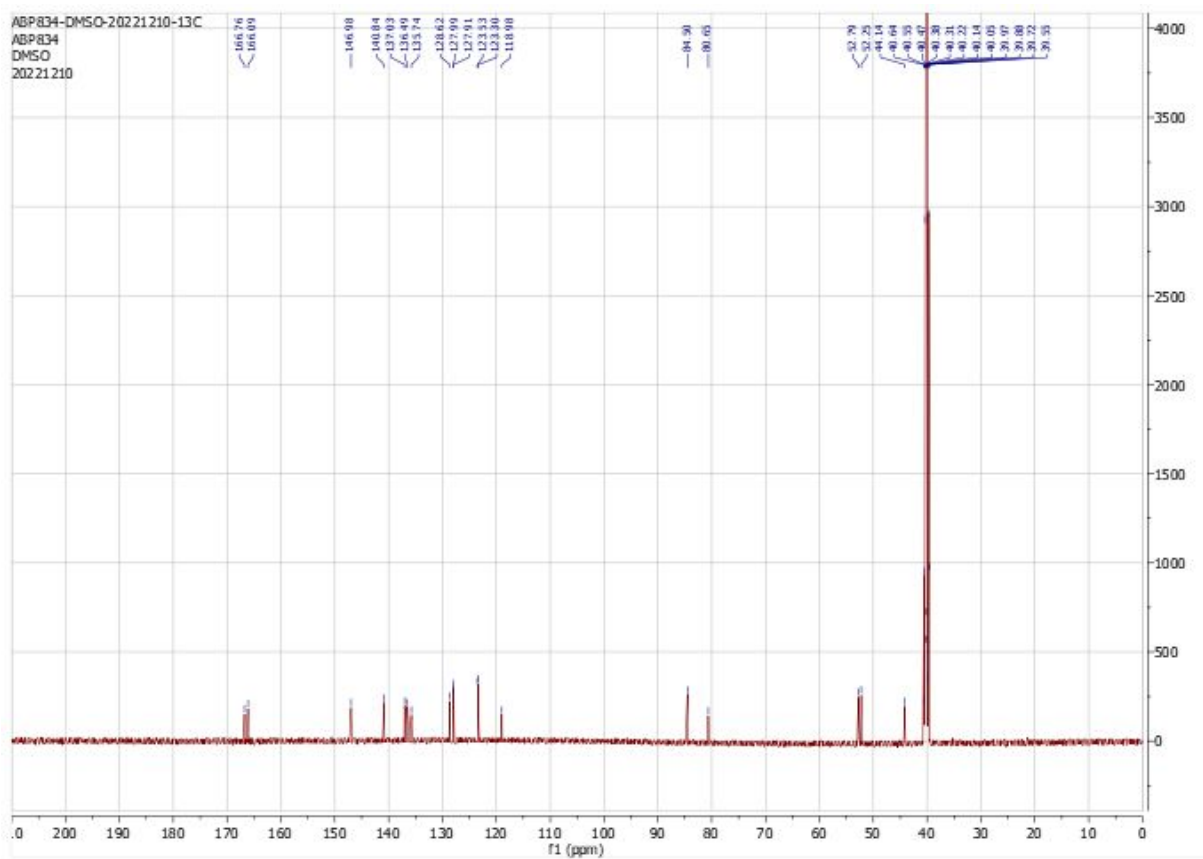



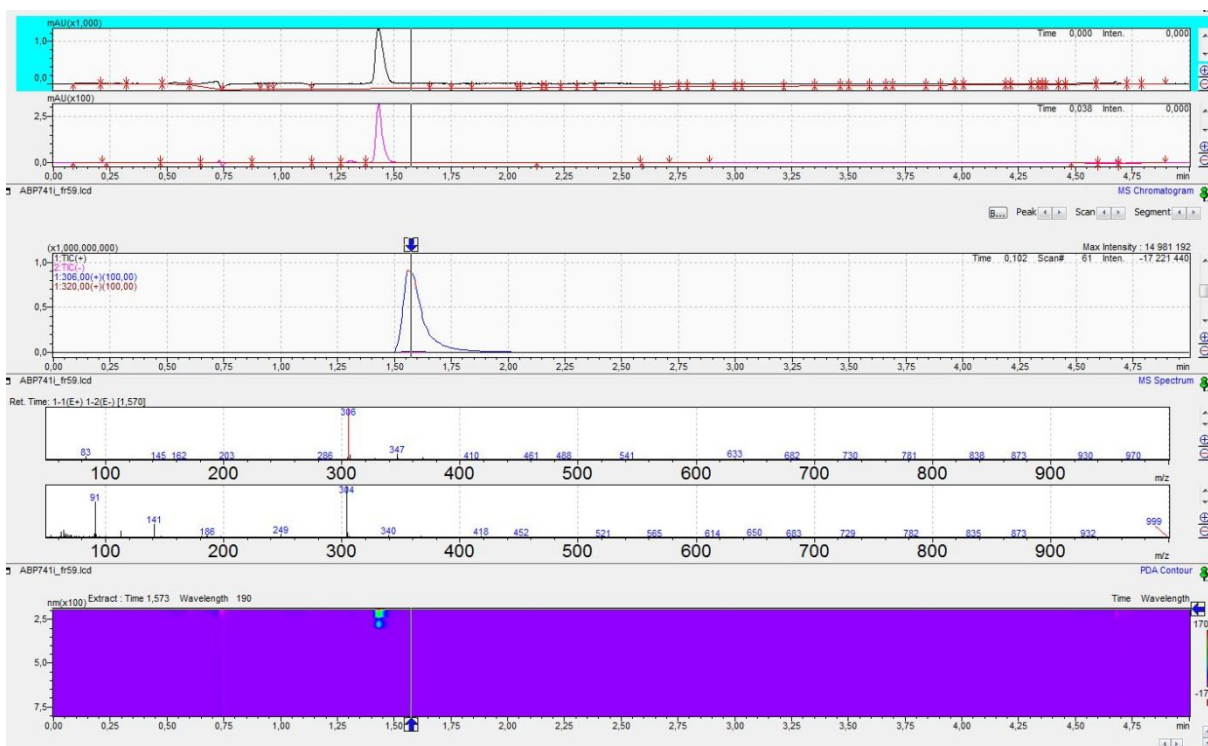

| Peak# | Ret. Time | Height  | Area    | Area%  | Peak# | Ret. Time | Height | Area   | Area%  |
|-------|-----------|---------|---------|--------|-------|-----------|--------|--------|--------|
| 1     | 0.714     | 22833   | 46626   | 1.416  | 1     | 0.777     | 3516   | 7793   | 1.216  |
| 2     | 1.082     | 15914   | 48991   | 1.488  | 2     | 1.309     | 8676   | 17482  | 2.728  |
| 3     | 1.432     | 1266827 | 3197446 | 97.096 | 3     | 1.432     | 294473 | 615542 | 96.056 |
| Total |           | 1305574 | 3293063 | 100    | Total |           | 306664 | 640818 | 100    |

$^1\text{H}$ ,  $^{13}\text{C}$  NMR spectra and HPLC-MS chromatogram and spectrum of **3**

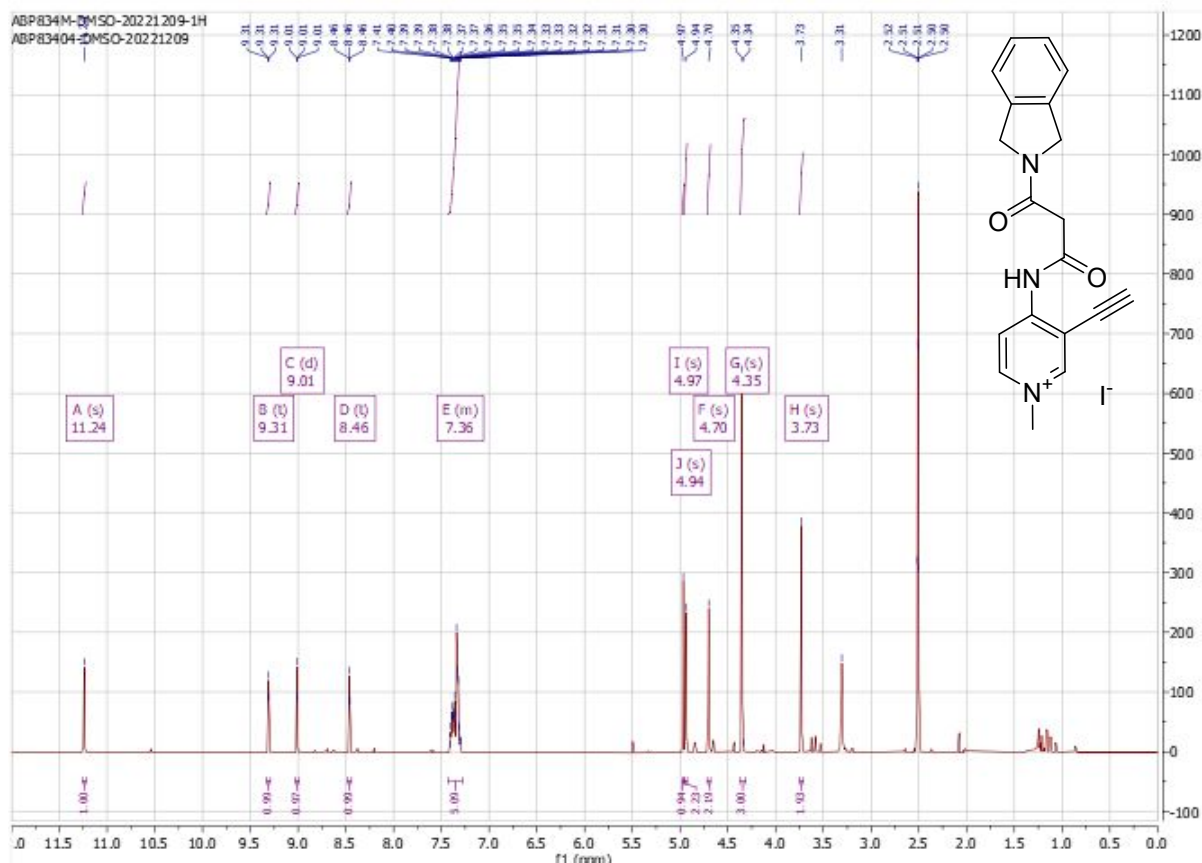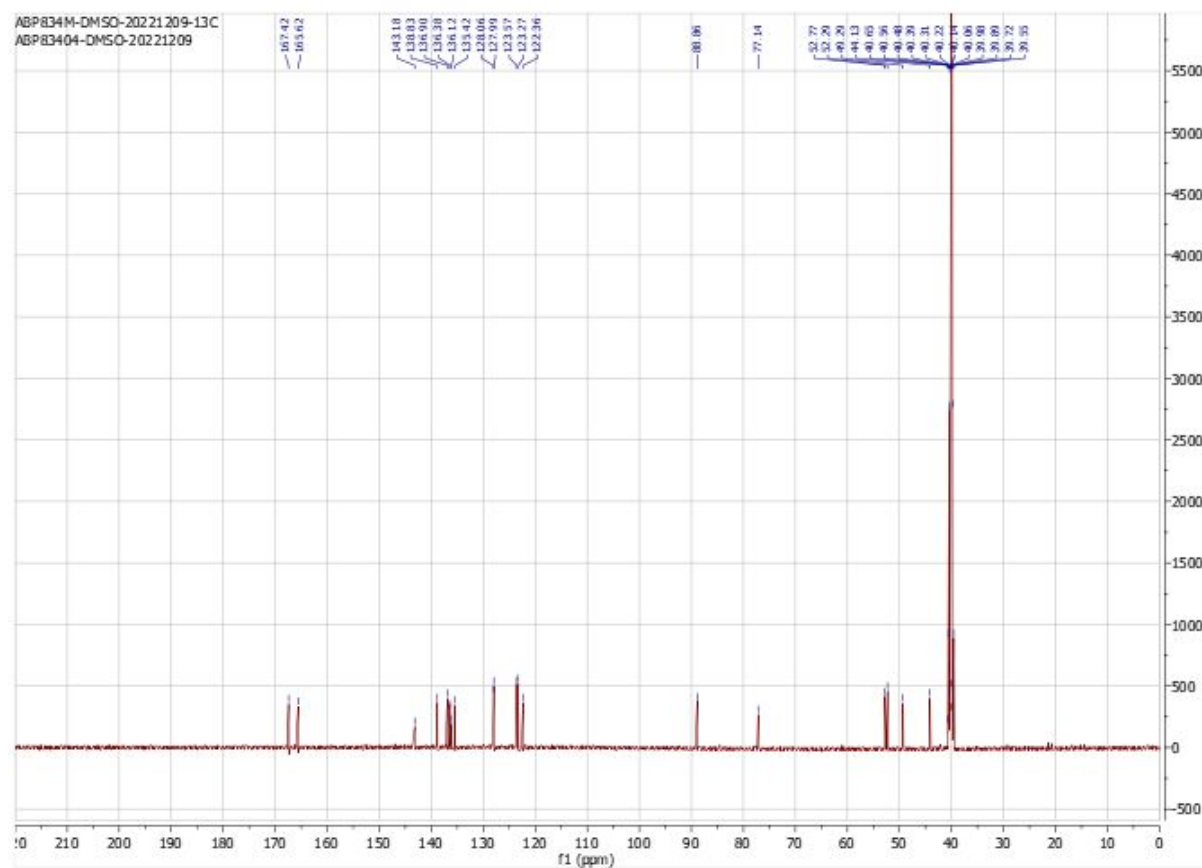



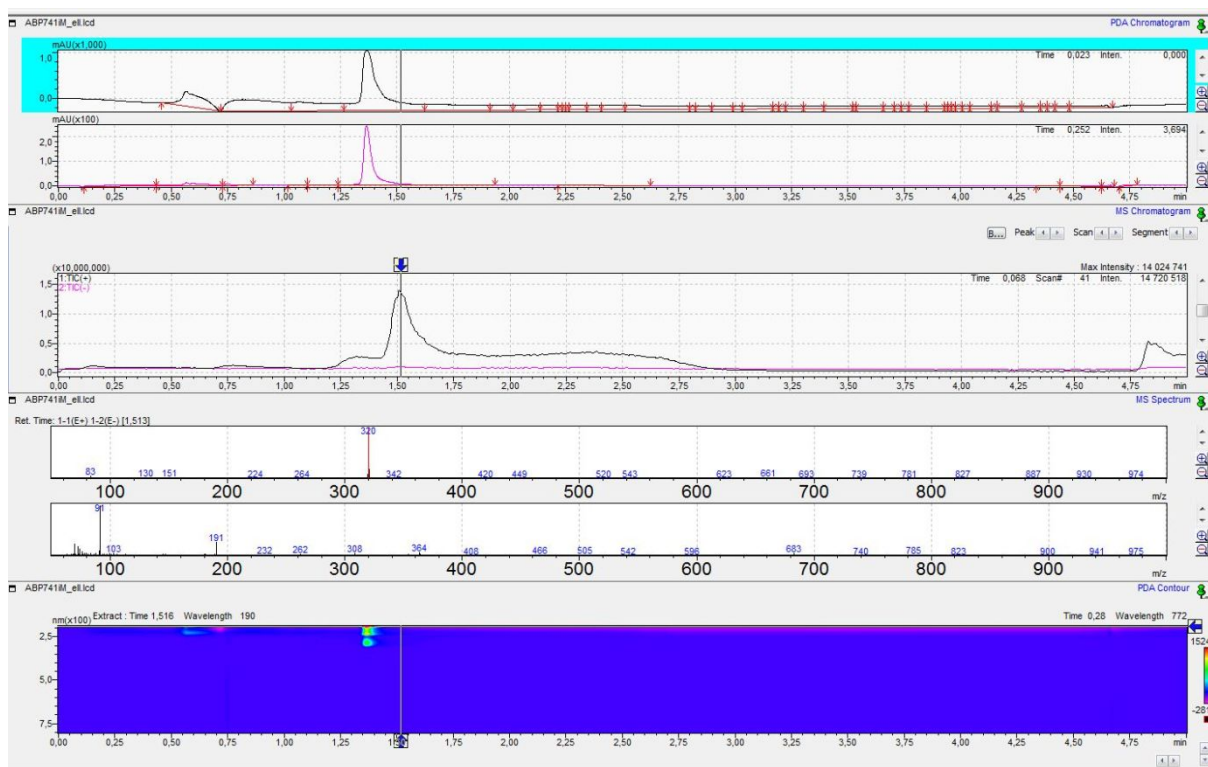

| Peak# | Ret. Time | Height  | Area    | Area%  | Peak# | Ret. Time | Height | Area   | Area%  |
|-------|-----------|---------|---------|--------|-------|-----------|--------|--------|--------|
| 1     | 0.566     | 92037   | 113344  | 2.367  | 1     | 0.597     | 648    | 751    | 0.116  |
| 2     | 1.065     | 23731   | 105671  | 2.207  | 2     | 0.75      | 5234   | 11604  | 1.796  |
| 3     | 1.368     | 1130888 | 4558667 | 95.201 | 3     | 1.367     | 233787 | 633822 | 98.088 |
| 4     | 1.666     | 5801    | 10776   | 0.225  | Total |           | 239670 | 646177 | 100    |
| Total |           | 1252457 | 4788458 | 100    |       |           |        |        |        |

### Supplementary Tables S1, S2, S3

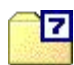

Supplementary  
tables.7z
